# Supplementary material
Source: ML conference proceedings conference paper supplement (https://openreview.net/forum?id=y8UAQQHVTX)
Supplement: supplementary_material [file attachment]

---

# Private Everlasting Prediction

---

Anonymous Author(s)

Affiliation

Address

email

## Abstract

1 A private learner is trained on a sample of labeled points and generates  
2 a hypothesis that can be used for predicting the labels of newly sampled  
3 points while protecting the privacy of the training set [Kasiviswanathan  
4 et al., FOCS 2008]. Research uncovered that private learners may need to  
5 exhibit significantly higher sample complexity than non-private learners  
6 as is the case with, e.g., learning of one-dimensional threshold functions  
7 [Bun et al., FOCS 2015, Alon et al., STOC 2019].

8 We explore prediction as an alternative to learning. Instead of putting  
9 forward a hypothesis, a predictor answers a stream of classification queries.  
10 Earlier work has considered a private prediction model with just a single  
11 classification query [Dwork and Feldman, COLT 2018]. We observe that  
12 when answering a stream of queries, a predictor must modify the hypothesis  
13 it uses over time, and, furthermore, that it must use the queries for this  
14 modification, hence introducing potential privacy risks with respect to the  
15 queries themselves.

16 We introduce *private everlasting prediction* taking into account the privacy  
17 of both the training set *and* the (adaptively chosen) queries made to the  
18 predictor. We then present a generic construction of private everlasting  
19 predictors in the PAC model. The sample complexity of the initial training  
20 sample in our construction is quadratic (up to polylog factors) in the VC  
21 dimension of the concept class. Our construction allows prediction for  
22 all concept classes with finite VC dimension, and in particular threshold  
23 functions with constant size initial training sample, even when considered  
24 over infinite domains, whereas it is known that the sample complexity  
25 of privately learning threshold functions must grow as a function of the  
26 domain size and hence is impossible for infinite domains.

## 27 1 Introduction

28 A PAC learner is given labeled examples  $S = \{(x_i, y_i)\}_{i \in [n]}$  drawn i.i.d. from an unknown  
29 underlying probability distribution  $\mathcal{D}$  over a data domain  $X$  and outputs a hypothesis  $h$   
30 that can be used for predicting the label of fresh points  $x_{n+1}, x_{n+2}, \dots$  sampled from the same  
31 underlying probability distribution  $\mathcal{D}$  [Valiant, 1984]. It is well known that when points  
32 are labeled by a concept selected from a concept class  $C = \{c : X \rightarrow \{0, 1\}\}$  then learning is  
33 possible with sample complexity proportional to the VC dimension of the concept class.

34 Learning often happens in settings where the underlying training data is related to indi-  
35 viduals and privacy-sensitive and where a learner is required, for legal, ethical, or other  
36 reasons, to protect personal information from being leaked in the learned hypothesis  $h$ .  
37 Private learning was introduced by Kasiviswanathan et al. [2011], as a theoretical model for

38 studying such tasks. A *private learner* is a PAC learner that preserves differential privacy  
 39 with respect to its training set  $S$ . That is, the learner’s distribution on outcome hypotheses  
 40 must not depend too strongly on any single example in  $S$ . Kasiviswanathan et al. showed  
 41 via a generic construction that any finite concept class can be learned privately and with  
 42 sample complexity  $n = O(\log|C|)$ . This value ( $O(\log|C|)$ ) can be significantly higher than the  
 43 VC dimension of the concept class  $C$  (see below).

44 It is now understood that the gap between the sample complexity of private and non-private  
 45 learners is essential – an important example is private learning of threshold functions  
 46 (defined over an ordered domain  $X$  as  $C_{\text{thresh}} = \{c_t\}_{t \in X}$  where  $c_t(x) = \mathbb{1}_{x \geq t}$ ), which requires  
 47 sample complexity that is asymptotically higher than the (constant) VC dimension of  $C_{\text{thresh}}$ .  
 48 In more detail, with *pure* differential privacy, the sample complexity of private learning is  
 49 characterized by the representation dimension of the concept class [Beimel et al., 2013a].  
 50 The representation dimension of  $C_{\text{thresh}}$  (hence, the sample complexity of private learning  
 51 thresholds) is  $\Theta(\log|X|)$  [Feldman and Xiao, 2015]. With *approximate* differential privacy,  
 52 the sample complexity of learning threshold functions is  $\Theta(\log^*|X|)$  [Beimel et al., 2013b,  
 53 Bun et al., 2015, Alon et al., 2019, Kaplan et al., 2020, Cohen et al., 2022]. Hence, in  
 54 both the pure and approximate differential privacy cases, the sample complexity grows  
 55 with the cardinality of the domain  $|X|$  and no private learner exists for threshold functions  
 56 over infinite domains, such as the integers and the reals, whereas low sample complexity  
 57 non-private learners exist for these tasks.

58 **Privacy preserving (black-box) prediction.** Dwork and Feldman [2018] proposed privacy-  
 59 preserving prediction as an alternative for private learning. Noting that “[i]t is now known  
 60 that for some basic learning problems [. . .] producing an accurate private model requires  
 61 much more data than learning without privacy,” they considered a setting where “users  
 62 may be allowed to query the prediction model on their inputs only through an appropriate  
 63 interface”. That is, a setting where the learned hypothesis is not made public. Instead, it may  
 64 be accessed in a “black-box” manner via a privacy-preserving query-answering prediction  
 65 interface. The prediction interface is required to preserve the privacy of its training set  $S$ :  
 66 **Definition 1.1** (private prediction interface [Dwork and Feldman, 2018] (rephrased)). A  
 67 prediction interface  $M$  is  $(\epsilon, \delta)$ -differentially private if for every interactive query generating  
 68 algorithm  $Q$ , the output of the interaction between  $Q$  and  $M(S)$  is  $(\epsilon, \delta)$ -differentially private  
 69 with respect to  $S$ .

70 Dwork and Feldman focused on the setting where the entire interaction between  $Q$  and  
 71  $M(S)$  consists of issuing a single prediction query and answering it:

72 **Definition 1.2** (Single query prediction [Dwork and Feldman, 2018]). Let  $M$  be an algorithm  
 73 that given a set of labeled examples  $S$  and an unlabeled point  $x$  produces a label  $y$ .  $M$   
 74 is an  $(\epsilon, \delta)$ -differentially private prediction algorithm if for every  $x$ , the output  $M(S, x)$  is  
 75  $(\epsilon, \delta)$ -differentially private with respect to  $S$ .

76 W.r.t. answering a single prediction query, Dwork and Feldman showed that the sample  
 77 complexity of such predictors is proportional to the VC dimension of the concept class.

## 78 1.1 Our contributions

79 In this work, we extend private prediction beyond a single query to answering any sequence  
 80 – *unlimited in length* – of prediction queries. We refer to this as *private everlasting prediction*.  
 81 Our goal is to present a generic private everlasting predictor with low training sample  
 82 complexity  $|S|$ .

83 **Private prediction interfaces when applied to a large number of queries.** We begin by  
 84 examining private everlasting prediction under the framework of Definition 1.1. We prove:  
 85 **Theorem 1.3** (informal version of Theorem 3.3). *Let  $A$  be a private everlasting prediction*  
 86 *interface for concept class  $C$  and assume  $A$  bases its predictions solely on the initial training set  $S$ ,*  
 87 *then there exists a private learner for concept class  $C$  with sample complexity  $|S|$ .*

88 This means that everlasting predictors that base their prediction solely on the initial training  
 89 set  $S$  are subject to the same complexity lowerbounds as private learners. Hence, to avoid

90 private learning lowerbounds, private everlasting predictors need to rely on more than  
91 the initial training sample  $S$  as a source of information about the underlying probability  
92 distribution and the labeling concept.

93 In this work, we choose to allow the everlasting predictor to rely on the queries made -  
94 which are unlabeled points from the domain  $X$ , assuming the queries are drawn from the  
95 same distribution the initial training  $S$  is sampled from. This requires changing the privacy  
96 definition, as Definition 1.1 does not protect the queries made, yet the classification given to  
97 a query can now depend on and hence reveal information provided in queries made earlier.

98 **A definition of private everlasting predictors.** Our definition of private everlasting  
99 predictors is motivated by the observations above. Consider an algorithm  $\mathcal{A}$  that is first  
100 fed with a training set  $S$  of labeled points and then executes for an unlimited number of  
101 rounds, where in round  $i$  algorithm  $\mathcal{A}$  receives as input a query point  $x_i$  and produces  
102 a label  $\hat{y}_i$ . We say that  $\mathcal{A}$  is an everlasting predictor if, when the (labeled) training set  $S$   
103 and the (unlabeled) query points are coming from the same underlying distribution,  $\mathcal{A}$   
104 answers each query points  $x_i$  with a good hypothesis  $h_i$ , and hence the label  $\hat{y}_i$  produced  
105 by  $\mathcal{A}$  is correct with high probability. We say that  $\mathcal{A}$  is a *private* everlasting predictor if its  
106 sequence of predictions  $\hat{y}_1, \hat{y}_2, \hat{y}_3, \dots$  protects both the privacy of the training set  $S$  and the  
107 query points  $x_1, x_2, x_3, \dots$  in face of any adversary that adaptively chooses the query points.

108 We emphasize that while private everlasting predictors need to exhibit average-case utility  
109 – as good prediction is required only for the case where  $S$  and  $x_1, x_2, x_3, \dots$  are selected  
110 i.i.d. from the same underlying distribution – our privacy requirement is worst-case, and  
111 holds in face of an *adaptive* adversary that chooses each query point  $x_i$  after receiving the  
112 prediction provided for  $(x_1, \dots, x_{i-1})$ , and not necessarily in accordance with any probability  
113 distribution.

114 **A generic construction of private everlasting predictors.** Our construction, called  
115 `GenericBBL`, executes in rounds. The input to the first round is the initial labeled training  
116 set  $S$ , where the number of samples in  $S$  is quadratic in the VC dimension of the concept  
117 class. Each other round begins with a collection  $S_i$  of labeled examples and ends with newly  
118 generated collection of labeled examples  $S_{i+1}$ . The set  $S$  is assumed to be consistent with  
119 some concept  $c \in C$  and our construction ensures that this is the case also for the sets  $S_i$  for  
120 all  $i$ . We briefly describe the main computations performed in each round of `GenericBBL`.<sup>1</sup>

- 121 • **Round initialization:** At the outset of a round, the labeled set  $S_i$  is partitioned into  
122 sub-sets, each with number of samples which is proportional to the VC dimension  
123 (so we have  $\approx \frac{|S_i|}{\text{VC}(C)}$  sub-sets). Each of the sub-sets is used for training a classifier  
124 non-privately, hence creating a collection of classifiers  $F_i = \{f : X \rightarrow \{0, 1\}\}$  that are used  
125 throughout the round.
- 126 • **Query answering:** Queries are issued to the predictor in an online manner. Each query  
127 is first labeled by each of the classifiers in  $F_i$ . Then the predicted label is computed by  
128 applying a privacy-preserving majority vote on these intermediate labels. (By standard  
129 composition theorems for differential privacy, we could answer roughly  $|F_i|^2 \approx \left(\frac{|S_i|}{\text{VC}(C)}\right)^2$   
130 queries without exhausting our privacy budget.) To save on the privacy budget, the  
131 majority vote is based on the `BetweenThresholds` mechanism of [Bun et al. \[2016\]](#)  
132 (which in turn is based on the sparse vector technique). The algorithm fails when the  
133 privacy budget is exhausted. However, when queries are sampled from the underlying  
134 distribution then with a high enough probability the labels produced by the classifiers  
135 in  $F_i$  would exhibit a clear majority.
- 136 • **Generating a labeled set for the following round:** The predictions provided in the  
137 duration of a round are not guaranteed to be consistent with any concept in  $C$  and  
138 hence cannot be used to set the following round. Instead, at the end of the round these  
139 points are relabeled consistently with  $C$  using a technique developed by [Beimel et al.](#)

---

<sup>1</sup>Important details, such as privacy amplification via sampling and management of the learning accuracy and error parameters are omitted from the description provided in this section.

140 [2021] in the context of private semi-supervised learning. Let  $S_{i+1}$  denote the query  
141 points obtained during the  $i$ th round, after (re)labeling them. This is a collection of  
142 size  $|S_{i+1}| \approx \left(\frac{|S_i|}{\sqrt{\text{VC}(C)}}\right)^2$ . Hence, provided that  $|S_i| \gtrsim (\text{VC}(C))^2$  we get that  $|S_{i+1}| > |S_i|$  which  
143 allows us to continue to the next round with more data than we had in the previous  
144 round.

145 **Theorem 1.4** (informal version of Theorem 5.1). *For every concept class  $C$ , Algorithm*  
146 *GenericBBL is a private everlasting predictor requiring an initial set of labeled examples which is*  
147 *(upto polylogarithmic factors) quadratic in the VC dimension of  $C$ .*

## 148 1.2 Related work

149 Beyond the work of Dwork and Feldman [2018] on private prediction mentioned above, our  
150 work is related to private semi-supervised learning and joint differential privacy.

151 **Semi-supervised private learning.** As in the model of private semi-supervised learning of  
152 Beimel et al. [2021], our predictors depend on both labeled and unlabeled sample. Beyond  
153 the obvious difference between the models (outputting a hypothesis vs. providing black-box  
154 prediction), a major difference between the settings is that in the work of Beimel et al. [2021]  
155 all samples – labeled and unlabeled - are given at once at the outset of the learning process  
156 whereas in the setting of everlasting predictors the unlabeled samples are supplied in an  
157 online manner. Our construction of private everlasting predictors uses tools developed for  
158 the semi-supervised setting, and in particular Algorithm LabelBoost of of Beimel et al.

159 **Joint differential privacy.** Kearns et al. [2015] introduced joint differential privacy (JDP)  
160 as a relaxation of differential privacy applicable for mechanism design and games. For  
161 every user  $u$ , JDP requires that the outputs jointly seen by all other users would preserve  
162 differential privacy w.r.t. the input of  $u$ . Crucially, in JDP users select their inputs ahead of  
163 the computation. In our settings, the inputs to a private everlasting predictor are prediction  
164 queries which are chosen in an online manner, and hence a query can depend on previous  
165 queries and their answers. Yet, similarly to JDP, the outputs provided to queries not  
166 performed by a user  $u$  should jointly preserve differential privacy w.r.t. the query made by  
167  $u$ . Our privacy requirement hence extends JDP to an adaptive online setting.

168 **Additional works on private prediction.** Bassily et al. [2018] studied a variant of the  
169 private prediction problem where the algorithm takes a labeled sample  $S$  and is then  
170 required to answer  $m$  prediction queries (i.e., label a sequence of  $m$  unlabeled points  
171 sampled from the same underlying distribution). They presented algorithms for this task  
172 with sample complexity  $|S| \gtrsim \sqrt{m}$ . This should be contrasted with our model and results,  
173 where the sample complexity is independent of  $m$ . The bounds presented by Dwork and  
174 Feldman [2018] and Bassily et al. [2018] were improved by Dagan and Feldman [2020] and  
175 by Nandi and Bassily [2020] who presented algorithms with improved dependency on the  
176 accuracy parameter in the agnostic setting.

## 177 1.3 Discussion and open problems

178 We show how to transform any (non-private) learner for the class  $C$  (with sample complexity  
179 proportional to the VC dimension of  $C$ ) to a private everlasting predictor for  $\bar{C}$ . Our  
180 construction is not polynomial time due to the use of Algorithm LabelBoost, and requires  
181 an initial set  $S$  of labeled examples which is quadratic in the VC dimension. We leave open  
182 the question whether  $|S|$  can be reduced to be linear in the VC dimension and whether the  
183 construction can be made polynomial time. A few remarks are in order:

- 184 1. Even though our generic construction is not computationally efficient, it does re-  
185 sult in efficient learners for several interesting special cases. Specifically, algorithm  
186 LabelBoost can be implemented efficiently whenever given an input sample  $S$  we  
187 could efficiently enumerate all possible dichotomies from the target class  $C$  over the  
188 points in  $S$ . In particular, this is the case for the class of 1-dim threshold functions  
189  $C_{\text{thresh}}$ , as well as additional classes with constant VC dimension. Another notable

190 example is the class  $C_{thresh}^{enc}$  which intuitively is an “encrypted” version of  $C_{thresh}$ . [Bun](#)  
 191 [and Zhandry \[2016\]](#) showed that (under plausible cryptographic assumptions) the  
 192 class  $C_{thresh}^{enc}$  cannot be learned privately and efficiently, while non-private learning is  
 193 possible efficiently. Our construction can be implemented efficiently for this class. This  
 194 provides an example where private everlasting prediction can be done efficiently, while  
 195 (standard) private learning is possible but inefficient.

- 196 2. It is now known that some learning tasks require the produced model to memorize  
 197 parts of the training set in order to achieve good learning rates, which in particular  
 198 disallows the learning algorithm from satisfying (standard) differential privacy [[Brown](#)  
 199 [et al., 2021](#)]. Our notion of private everlasting prediction circumvents this issue, since  
 200 the model is never publicly released and hence the fact that it must memorize parts  
 201 of the sample is not of a direct privacy threat. In other words, our work puts forward  
 202 a private learning model which, in principle, allows memorization. This could have  
 203 additional applications in broader settings.
- 204 3. As we mentioned, in general, private everlasting predictors cannot base their predic-  
 205 tions solely on the initial training set, and in this work we choose to rely on the *queries*  
 206 presented to the algorithm (in addition to the training set). Our construction can be  
 207 easily adapted to a setting where the content of the blackbox is updated based on *fresh*  
 208 *unlabeled samples* (whose privacy would be preserved), instead of relying on the query  
 209 points themselves. This might be beneficial to avoid poisoning attacks via the queries.

## 210 2 Preliminaries

### 211 2.1 Preliminaries from differential privacy

**Definition 2.1** ( $(\epsilon, \delta)$ -indistinguishability). Let  $R_0, R_1$  be two random variables over the  
 same support. We say that  $R_0, R_1$  are  $(\epsilon, \delta)$ -indistinguishable if for every event  $E$  defined  
 over the support of  $R_0, R_1$ ,

$$\Pr[R_0 \in E] \leq e^\epsilon \cdot \Pr[R_1 \in E] + \delta \quad \text{and} \quad \Pr[R_1 \in E] \leq e^\epsilon \cdot \Pr[R_0 \in E] + \delta.$$

212 **Definition 2.2.** Let  $X$  be a data domain. Two datasets  $x, x' \in X^n$  are called *neighboring* if  
 213  $|\{i : x_i \neq x'_i\}| = 1$ .

214 **Definition 2.3** (differential privacy [[Dwork et al., 2006](#)]). A mechanism  $M : X^n \rightarrow Y$  is  
 215  $(\epsilon, \delta)$ -differentially private if  $M(x)$  and  $M(x')$  are  $(\epsilon, \delta)$ -indistinguishable for all neighboring  
 216  $x, x' \in X^n$ .

217 In our analysis, we use the post-processing and composition properties of differential  
 218 privacy, that we cite in their simplest form.

219 **Proposition 2.4** (post-processing). Let  $M_1 : X^n \rightarrow Y$  be an  $(\epsilon, \delta)$ -differentially private algorithm  
 220 and  $M_2 : Y \rightarrow Z$  be any algorithm. Then the algorithm that on input  $x \in X^n$  outputs  $M_2(M_1(x))$   
 221 is  $(\epsilon, \delta)$ -differentially private.

222 **Proposition 2.5** (composition). Let  $M_1$  be a  $(\epsilon_1, \delta_1)$ -differentially private algorithm and let  
 223  $M_2$  be  $(\epsilon_2, \delta_2)$ -differentially private algorithm. Then the algorithm that on input  $x \in X^n$  outputs  
 224  $(M_1(x), M_2(x))$  is  $(\epsilon_1 + \epsilon_2, \delta_1 + \delta_2)$ -differentially private.

225 **Definition 2.6** (Exponential mechanism [[McSherry and Talwar, 2007](#)]). Let  $q : X^n \times Y \rightarrow \mathbb{R}$   
 226 be a score function defined over data domain  $X$  and output domain  $Y$ . Define  $\Delta =$   
 227  $\max(|q(x, r) - q(x', y)|)$  where the maximum is taken over all  $y \in Y$  and neighbouring  
 228 databases  $x, x' \in X^n$ . The exponential mechanism is the  $\epsilon$ -differentially private mecha-  
 229 nism which selects an output  $y \in Y$  with probability proportional to  $e^{\frac{\epsilon q(x, y)}{2\Delta}}$ .

230 **Claim 2.7** (Privacy amplification by sub-sampling [[Kasiviswanathan et al., 2011](#)]). Let  $\mathcal{A}$   
 231 be an  $(\epsilon', \delta')$ -differentially private algorithm operating on a database of size  $n$ . Let  $\epsilon \leq 1$  and  
 232 let  $t = \frac{n}{\epsilon} (3 + \exp(\epsilon'))$ . Construct an algorithm  $\mathcal{B}$  operating the database  $D = (z_i)_{i=1}^t$ . Algorithm  
 233  $\mathcal{B}$  randomly selects a subset  $J \subseteq \{1, 2, \dots, t\}$  of size  $n$ , and executes  $\mathcal{A}$  on  $D_J = (z_i)_{i \in J}$ . Then  $\mathcal{B}$  is  
 234  $(\epsilon, \frac{4\epsilon'}{3 + \exp(\epsilon')} \delta')$ -differentially private.

235 **2.2 Preliminaries from PAC learning**

236 A concept class  $C$  over data domain  $X$  is a set of predicates  $c : X \rightarrow \{0, 1\}$  (called concepts)  
 237 which label points of the domain  $X$  by either 0 or 1. A learner  $\mathcal{A}$  for concept class  $C$  is  
 238 given  $n$  examples sampled i.i.d. from an unknown probability distribution  $\mathcal{D}$  over the data  
 239 domain  $X$  and labeled according to an unknown target concept  $c \in C$ . The learner should  
 240 output a hypothesis  $h : X \rightarrow [0, 1]$  that approximates  $c$  for the distribution  $\mathcal{D}$ . More formally,

241 **Definition 2.8** (generalization error). The *generalization error* of a hypothesis  $h : X \rightarrow [0, 1]$   
 242 with respect to concept  $c$  and distribution  $\mathcal{D}$  is defined as  $\text{error}_{\mathcal{D}}(c, h) = \text{Exp}_{x \sim \mathcal{D}}[|h(x) - c(x)|]$ .

**Definition 2.9** (PAC learning [Valiant, 1984]). Let  $C$  be a concept class over a domain  $X$ .  
 Algorithm  $\mathcal{A}$  is an  $(\alpha, \beta, n)$ -PAC learner for  $C$  if for all  $c \in C$  and all distributions  $\mathcal{D}$  on  $X$ ,

$$\Pr[(x_1, \dots, x_n) \sim \mathcal{D}^n ; h \sim \mathcal{A}((x_1, c(x_1)), \dots, (x_n, c(x_n))) ; \text{error}_{\mathcal{D}}(c, h) \leq \alpha] \geq 1 - \beta,$$

243 where the probability is over the sampling of  $(x_1, \dots, x_n)$  from  $\mathcal{D}$  and the coin tosses of  $\mathcal{A}$ .  
 244 The parameter  $n$  is the *sample complexity* of  $\mathcal{A}$ .

245 See Appendix A for additional preliminaries on PAC learning.

246 **2.3 Preliminaries from private learning**

247 **Definition 2.10** (private PAC learning [Kasiviswanathan et al., 2011]). Algorithm  $\mathcal{A}$  is  
 248 a  $(\alpha, \beta, \epsilon, \delta, n)$ -private PAC learner if (i)  $\mathcal{A}$  is an  $(\alpha, \beta, n)$ -PAC learner and (ii)  $\mathcal{A}$  is  $(\epsilon, \delta)$   
 249 differentially private.

250 Kasiviswanathan et al. [2011] provided a generic private learner with  $O(\text{VC}(C) \log(|X|))$   
 251 labeled samples. Beimel et al. [2013a] introduced the representation dimension and showed  
 252 that any concept class  $C$  can be privately learned with  $\Theta(\text{RepDim}(C))$  samples.<sup>2</sup> For the  
 253 sample complexity of  $(\epsilon, \delta)$ -differentially private learning of threshold functions over do-  
 254 main  $X$ , Bun et al. [2015] give a lower bound of  $\Omega(\log^* |X|)$ . Recently, Cohen et al. [2022]  
 255 give a (nearly) matching upper bound of  $\tilde{O}(\log^* |X|)$ .

256 **3 Towards private everlasting prediction**

257 In this work, we extend private prediction beyond a single query to answering any sequence  
 258 – unlimited in length – of prediction queries. Our goal is to present a generic private  
 259 everlasting predictor with low training sample complexity  $|S|$ .

260 **Definition 3.1** (everlasting prediction). Let  $\mathcal{A}$  be an algorithm with the following properties:

- 261 1. Algorithm  $\mathcal{A}$  receives as input  $n$  labeled examples  $S = \{(x_i, y_i)\}_{i=1}^n \in (X \times \{0, 1\})^n$  and  
 262 selects a hypothesis  $h_0 : X \rightarrow \{0, 1\}$ .
- 263 2. For round  $r \in \mathbb{N}$ , algorithm  $\mathcal{A}$  gets a query, which is an unlabeled element  $x_{n+r} \in X$ ,  
 264 outputs  $h_{r-1}(x_{n+r})$  and selects a hypothesis  $h_r : X \rightarrow \{0, 1\}$ .

265 We say that  $\mathcal{A}$  is an  $(\alpha, \beta, n)$ -*everlasting predictor* for a concept class  $C$  over a domain  $X$  if the  
 266 following holds for every concept  $c \in C$  and for every distribution  $\mathcal{D}$  over  $X$ . If  $x_1, x_2, \dots$  are  
 267 sampled i.i.d. from  $\mathcal{D}$ , and the labels of the  $n$  initial samples  $S$  are correct, i.e.,  $y_i = c(x_i)$  for  
 268  $i \in [n]$ , then  $\Pr[\exists r \geq 0$  s.t.  $\text{error}_{\mathcal{D}}(c, h_r) > \alpha] \leq \beta$ , where the probability is over the sampling  
 269 of  $x_1, x_2, \dots$  from  $\mathcal{D}$  and the randomness of  $\mathcal{A}$ .

270 **Definition 3.2.** An algorithm  $\mathcal{A}$  is an  $(\alpha, \beta, \epsilon, \delta, n)$ -*everlasting differentially private predic-*  
 271 *tion interface* if (i)  $\mathcal{A}$  is a  $(\epsilon, \delta)$ -differentially private prediction interface  $M$  (as in Defini-  
 272 tion 1.1), and (ii)  $\mathcal{A}$  is an  $(\alpha, \beta, n)$ -*everlasting predictor*.

273 As a warmup, consider an  $(\alpha, \beta, \epsilon, \delta, n)$ -*everlasting differentially private prediction interface*  
 274  $\mathcal{A}$  for concept class  $C$  over (finite) domain  $X$  (as in Definition 3.2 above). Assume that  $\mathcal{A}$  does  
 275 not vary its hypotheses, i.e. (in the language of Definition 3.1)  $h_r = h_0$  for all  $r > 0$ .<sup>3</sup> Note

<sup>2</sup>We omit the dependency on  $\epsilon, \delta, \alpha, \beta$  in this brief review.

<sup>3</sup>Formally,  $\mathcal{A}$  can be thought of as two mechanisms  $(M_0, M_1)$  where  $M_0$  is  $(\epsilon, \delta)$ -differentially private. (i) On input a labeled training sample  $S$  mechanism  $M_0$  computes a hypothesis  $h_0$ . (ii) On a query  $x \in X$  mechanism  $M_1$  replies  $h_0(x)$ .

276 that a computationally unlimited adversarial querying algorithm can recover the hypothesis  
 277  $h_0$  by issuing all queries  $x \in X$ . Hence, in using  $\mathcal{A}$  indefinitely we lose any potential benefits  
 278 to sample complexity of restricting access to  $h_0$  to being black-box and getting to the point  
 279 where the lower-bounds on  $n$  from private learning apply. A consequence of this simple  
 280 observation is that a private everlasting predictor cannot answer all prediction queries with  
 281 a single hypothesis – it must modify its hypothesis over time as it processes new queries.

282 We now take this observation a step further, showing that a private everlasting predictor  
 283 that answers prediction queries solely based on its training sample  $S$  is subject to the same  
 284 sample complexity lowerbounds as private learners.

285 Consider an  $(\alpha, \beta < 1/8, \epsilon, \delta, n)$ -everlasting differentially private prediction interface  $\mathcal{A}$  for  
 286 concept class  $C$  over (finite) domain  $X$  that upon receiving the training set  $S \in (X \times \{0, 1\})^n$   
 287 selects an infinite sequence of hypotheses  $\{h_r\}_{r \geq 0}$  where  $h_r : X \rightarrow \{0, 1\}$ . Formally, we  
 288 can think of  $\mathcal{A}$  as composed of three mechanisms  $\mathcal{A} = (M_0, M_1, M_2)$  where  $M_0$  is  $(\epsilon, \delta)$ -  
 289 differentially private:

- 290 • On input a labeled training sample  $S \in (X \times \{0, 1\})^n$  mechanism  $M_0$  computes an  
 291 initial state and an initial hypothesis  $(\sigma_0, h_0) = M_0(S)$ .
- 292 • On a query  $x_{n+r}$  mechanism  $M_1$  produces an answer  $M_1(x_{n+r}) = h_i(x_{n+r})$  and mech-  
 293 anism  $M_2$  updates the hypothesis-state pair  $(h_{r+1}, \sigma_{r+1}) = M_2(\sigma_r)$ .

294 Note that as  $M_0$  and  $M_2$  do not receive the sequence  $\{x_{n+r}\}_{r \geq 0}$  as input, the sequence  $\{h_r\}_{r \geq 0}$   
 295 depends solely on  $S$ . Furthermore as  $M_1$  and  $M_2$  post-process the outcome of  $M_0$ , i.e., the  
 296 sequence of queries and predictions  $\{(x_r, h_r(x_r))\}_{r \geq 0}$  preserves  $(\epsilon, \delta)$ -differential privacy with  
 297 respect to the training set  $S$ . In Appendix B we prove:

298 **Theorem 3.3.**  *$\mathcal{A}$  can be transformed into a  $(O(\alpha), O(\beta), \epsilon, \delta, O(n \log(1/\beta)))$ -private PAC learner  
 299 for  $C$ .*

### 300 3.1 A definition of private everlasting prediction

301 Theorem 3.3 requires us to seek private predictors whose prediction relies on more infor-  
 302 mation than what is provided by the initial labeled sample. Possibilities include requiring  
 303 the input of additional labeled or unlabeled examples during the lifetime of the predictor,  
 304 while protecting the privacy of these examples. In this work we choose to rely on the queries  
 305 for updating the predictor’s internal state. This introduces a potential privacy risk for these  
 306 queries as sensitive information about a query may be leaked in the predictions following it.  
 307 Furthermore, we need take into account that a privacy attacker may choose their queries  
 308 adversarially and adaptively.

309 **Definition 3.4** (private everlasting black-box prediction). An algorithm  $\mathcal{A}$  is an  $(\alpha, \beta, \epsilon, \delta, n)$ -  
 310 private everlasting black-box predictor for a concept class  $C$  if

- 311 1. **Prediction:**  $\mathcal{A}$  is an  $(\alpha, \beta, n)$ -everlasting predictor for  $C$  (as in Definition 3.1).
- 312 2. **Privacy:** For every adversary  $\mathcal{B}$  and every  $t \geq 1$ , the random variables  $\text{View}_{\mathcal{B}, t}^0$  and  
 313  $\text{View}_{\mathcal{B}, t}^1$  (defined in Figure 1) are  $(\epsilon, \delta)$ -indistinguishable.

## 314 4 Tools from prior works

315 We briefly describe tools from prior works that we use in our construction. See Appendix C  
 316 for a more detailed account.

317 **Algorithm LabelBoost [Beimel et al., 2021]:** Algorithm LabelBoost takes as input a  
 318 partially labeled database  $S \circ T \in (X \times \{0, 1, \perp\})^*$  (where the first portion of the database,  
 319  $S$ , contains labeled examples) and outputs a similar database where both  $S$  and  $T$  are  
 320 (re)labeled. We use the following lemmata from Beimel et al. [2021]:

321 **Lemma 4.1** (privacy of Algorithm LabelBoost). *Let  $\mathcal{A}$  be an  $(\epsilon, \delta)$ -differentially private al-  
 322 gorithm operating on labeled databases. Construct an algorithm  $\mathcal{B}$  that on input a partially*

**Parameters:**  $b \in \{0, 1\}$ ,  $t \in \mathbb{N}$ .

**Training Phase:**

1. The adversary  $\mathcal{B}$  chooses two sets of  $n$  labeled elements  $(x_1^0, y_1^0), \dots, (x_n^0, y_n^0)$  and  $(x_1^1, y_1^1), \dots, (x_n^1, y_n^1)$ , subject to the restriction  $\left| \left\{ i \in [n] : (x_i^0, y_i^0) \neq (x_i^1, y_i^1) \right\} \right| \in \{0, 1\}$ .
2. If  $\exists i$  s.t.  $(x_i^0, y_i^0) \neq (x_i^1, y_i^1)$  then set Flag = 1. Otherwise set Flag = 0.
3. Algorithm  $\mathcal{A}$  gets  $(x_1^b, y_1^b), \dots, (x_n^b, y_n^b)$  and selects a hypothesis  $h_0 : X \rightarrow \{0, 1\}$ .  
 $\setminus$ \* the adversary  $\mathcal{B}$  does not get to see the hypothesis  $h_0$  \* $\setminus$

**Prediction phase:**

4. For round  $r = 1, 2, \dots, t$ :
  - (a) If Flag = 1 then the adversary  $\mathcal{B}$  chooses two elements  $x_{n+r}^0 = x_{n+r}^1 \in X$ .  
Otherwise, the adversary  $\mathcal{B}$  chooses two elements  $x_{n+r}^0, x_{n+r}^1 \in X$ .
  - (b) If  $x_{n+r}^0 \neq x_{n+r}^1$  then Flag is set to 1.
  - (c) If  $x_{n+r}^0 = x_{n+r}^1$  then the adversary  $\mathcal{B}$  gets  $h_{r-1}(x_{n+r}^b)$ .  
 $\setminus$ \* the adversary  $\mathcal{B}$  does not get to see the label if  $x_{n+r}^0 \neq x_{n+r}^1$  \* $\setminus$
  - (d) Algorithm  $\mathcal{A}$  gets  $x_{n+r}^b$  and selects a hypothesis  $h_r : X \rightarrow \{0, 1\}$ .  
 $\setminus$ \* the adversary  $\mathcal{B}$  does not get to see the hypothesis  $h_r$  \* $\setminus$

Let  $\text{View}_{\mathcal{B}, t}^b$  be  $\mathcal{B}$ 's entire view of the execution, i.e., the adversary's randomness and the sequence of predictions in Step 4c.

Figure 1: Definition of  $\text{View}_{\mathcal{B}, t}^0$  and  $\text{View}_{\mathcal{B}, t}^1$ .

323 labeled database  $S \circ T \in (X \times \{0, 1, \perp\})^*$  applies  $\mathcal{A}$  on the outcome of  $\text{LabelBoost}(S \circ T)$ . Then,  $\mathcal{B}$   
324 is  $(\epsilon + 3, 4\epsilon\delta)$ -differentially private.

325 **Lemma 4.2** (Utility of Algorithm  $\text{LabelBoost}$ ). Fix  $\alpha$  and  $\beta$ , and let  $S \circ T$  be s.t.  $S$  is labeled  
326 by some target concept  $c \in C$ , and s.t.  $|T| \leq \frac{\beta}{\epsilon} \text{VC}(C) \exp(\frac{\alpha|S|}{2\text{VC}(C)}) - |S|$ . Consider the execution  
327 of  $\text{LabelBoost}$  on  $S \circ T$ , and let  $h$  denote the hypothesis chosen by  $\text{LabelBoost}$  to relabel  $S \circ T$ .  
328 With probability at least  $(1 - \beta)$  we have that  $\text{error}_S(h) \leq \alpha$ .

329 **Algorithm BetweenThresholds** [Bun et al., 2016]: Algorithm  $\text{BetweenThresholds}$  takes  
330 as input a database  $S \in X^n$  and thresholds  $t_\ell, t_u$ . It applies the sparse vector technique to  
331 answer noisy threshold queries with  $L$  (below threshold)  $R$  (above threshold) and  $\top$  (halt).  
332 We use the following lemmata by Bun et al. [2016] and observe that, using standard privacy  
333 amplification theorems, Algorithm  $\text{BetweenThresholds}$  can be modified to allow for  $c$  times  
334 of outputting  $\top$  before halting, with a (roughly)  $\sqrt{c}$  growth in its privacy parameter.

335 **Lemma 4.3** (Privacy for  $\text{BetweenThresholds}$ ). Let  $\epsilon, \delta \in (0, 1)$  and  $n \in \mathbb{N}$ . Then algorithm  
336  $\text{BetweenThresholds}$  is  $(\epsilon, \delta)$ -differentially private for any adaptively-chosen sequence of queries  
337 as long as the gap between the thresholds  $t_\ell, t_u$  satisfies  $t_u - t_\ell \geq \frac{12}{\epsilon n} (\log(10/\epsilon) + \log(1/\delta) + 1)$ .

338 **Lemma 4.4** (Accuracy of  $\text{BetweenThresholds}$ ). Let  $\alpha, \beta, \epsilon, t_\ell, t_u \in (0, 1)$  and  $n, k \in \mathbb{N}$  satisfy  
339  $n \geq \frac{8}{\alpha\epsilon} (\log(k+1) + \log(1/\beta))$ . Then, for any input  $x \in X^n$  and any adaptively-chosen sequence  
340 of queries  $q_1, q_2, \dots, q_k$ , the answers  $a_1, a_2, \dots, a_{\leq k}$  produced by  $\text{BetweenThresholds}$  on input  $x$   
341 satisfy the following with probability at least  $1 - \beta$ . For any  $j \in [k]$  such that  $a_j$  is returned before  
342  $\text{BetweenThresholds}$  halts, (i)  $a_j = L \implies q_j(x) \leq t_\ell + \alpha$ , (ii)  $a_j = R \implies q_j(x) \geq t_u - \alpha$ , and (iii)  
343  $a_j = \top \implies t_\ell - \alpha \leq q_j(x) \leq t_u + \alpha$ .

344 **Observation 1.** Using standard composition theorems for differential privacy (see, e.g., Dwork  
345 et al. [2010]), we can assume that algorithm  $\text{BetweenThresholds}$  takes another parameter  $c$ ,  
346 and halts after  $c$  times of outputting  $\top$ . In this case, the algorithm satisfies  $(\epsilon', 2c\delta)$ -differential  
347 privacy, for  $\epsilon' = \sqrt{2c \ln(\frac{1}{c\delta})} \epsilon + c\epsilon(e^\epsilon - 1)$ .



348 **5 A Generic Construction**

349 Our generic construction Algorithm `GenericBBL` transforms a (non-private) learner for  
 350 a concept class  $C$  into a private everlasting predictor for  $C$ . The proof of the following  
 351 theorem follows from Theorem 5.2 and Claim 5.3 which are proved in Appendix E.

352 **Theorem 5.1.** *Given  $\alpha, \beta, \delta < 1/16, \epsilon < 1$ , Algorithm `GenericBBL` is a  $(6\alpha, 4\beta, \epsilon, \delta, n)$ -private*  
 353 *everlasting predictor, where  $n$  is set as in Algorithm `GenericBBL`.*

---

**Algorithm `GenericBBL`**

---

**Initial input:** A labeled database  $S \in (X \times \{0, 1\})^n$  where  $n = \frac{8\tau}{\alpha^3 \epsilon^2} \cdot \left(8VC(C) \log\left(\frac{26}{\alpha}\right) + 4 \log\left(\frac{4}{\beta}\right)\right)^2 \cdot \log\left(\frac{1}{\delta}\right) \cdot \log^2\left(\frac{64VC(C) \log\left(\frac{26}{\alpha}\right) + 32 \log\left(\frac{4}{\beta}\right)}{\epsilon \alpha^2 \beta \delta}\right) \cdot (3 + \exp(\epsilon + 4))$ .

1. Let  $\tau > 1.1 * 10^{10}$ . Set  $\alpha_1 = \alpha/2, \beta_1 = \beta/2$ . Define  $\lambda_i = \frac{8VC(C) \log\left(\frac{13}{\alpha_i}\right) + 4 \log\left(\frac{2}{\beta_i}\right)}{\alpha_i}$ .  
 /\* by Theorem A.2  $\lambda_i$  samples suffice for PAC learning  $C$  with parameters  $\alpha_i, \beta_i$  \*/
  2. Let  $S_1 \subseteq S$  be a random subset of size  $n \cdot \frac{\epsilon}{3 + \exp(\epsilon + 4)} = \frac{\tau \cdot \lambda_1^2 \cdot \log\left(\frac{1}{\delta}\right) \cdot \log^2\left(\frac{\lambda_1}{\epsilon \alpha_1 \beta_1 \delta}\right)}{\alpha_1 \epsilon}$ .
  3. Repeat for  $i = 1, 2, 3, \dots$ 
    - (a) Divide  $S_i$  into  $T_i = \frac{\tau \cdot \lambda_i \cdot \log\left(\frac{1}{\delta}\right) \cdot \log^2\left(\frac{\lambda_i}{\epsilon \alpha_i \beta_i \delta}\right)}{\alpha_i \epsilon}$  disjoint databases  $S_{i,1}, \dots, S_{i,T_i}$  of size  $\lambda_i$ .
    - (b) For  $t \in [T_i]$  let  $f_t \in C$  be a hypothesis minimizing error $_{S_{i,t}}(\cdot)$ . Define  $F_i = (f_1, \dots, f_{T_i})$ .
    - (c) Set  $R_i = \frac{25600|S_i|}{\epsilon}$ . Set  $t_u = 1/2 + \alpha_i, t_\ell = 1/2 - \alpha_i$ . Set the privacy parameters  $\epsilon'_i = \frac{1}{3\sqrt{c_i \ln\left(\frac{2}{\delta}\right)}}$  and  $\delta'_i = \frac{\delta}{2c_i}$ , where  $c_i = 64\alpha_i R_i$ . Instantiate algorithm `BetweenThresholds` on the database of hypotheses  $F_i$  allowing for  $c_i = 64\alpha_i R_i$  rounds of  $\Upsilon$  while satisfying  $(1, \delta)$ -differential privacy (as in Observation 2).
    - (d) For  $\ell = 1$  to  $R_i$ :
      - i. Receive as input a prediction query  $x_{i,\ell} \in X$ .
      - ii. Give `BetweenThresholds` the query  $q_{x_{i,\ell}}$  where  $q_{x_{i,\ell}}(F_i) = \sum_{t \in [T_i]} f_t(x_{i,\ell})$ , and obtain an outcome  $y_{i,\ell} \in \{L, \Upsilon, R\}$ .
      - iii. Respond with the label 0 if  $y_{i,\ell} = L$  and 1 if  $y_{i,\ell} \in \{R, \Upsilon\}$ .
      - iv. If `BetweenThresholds` halts, then halt and fail (recall that `BetweenThresholds` only halts if  $c_i$  copies of  $\Upsilon$  were encountered during the current iteration).
    - (e) Denote  $D_i = (x_{i,1}, \dots, x_{i,R_i})$ .
    - (f) Let  $\hat{S}_i \subseteq S_i$  and  $\hat{D}_i \subseteq D_i$  be random subsets of size  $\frac{\epsilon |S_i|}{3 + \exp(\epsilon + 4)}$  and  $\frac{\epsilon |D_i|}{3 + \exp(\epsilon + 4)}$  respectively, and let  $\hat{S}'_i \circ \hat{D}'_i \leftarrow \text{LabelBoost}(\hat{S}_i \circ \hat{D}_i)$ . Let  $S_{i+1} \subseteq \hat{D}'_i$  be a random subset of size  $\lambda_{i+1} T_{i+1}$ .
    - (g) Set  $\alpha_{i+1} \leftarrow \alpha_i/2$  and  $\beta_{i+1} \leftarrow \beta_i/2$ .
- 

354 **Theorem 5.2** (accuracy of algorithm `GenericBBL`). *Given  $\alpha, \beta, \delta < 1/16, \epsilon < 1$ , for any con-*  
 355 *cept  $c$  and any round  $r$ , algorithm `GenericBBL` can predict the label of  $x_r$  as  $h_r(x_r)$ , such that*  
 356  *$\Pr[\text{error}_{\mathcal{D}}(c(x_r) \neq h_r(x_r)) \leq 6\alpha] \geq 1 - 4\beta$ .*

357 **Claim 5.3.** *`GenericBBL` is  $(\epsilon, \delta)$ -differentially private.*

358 **Remark 5.4.** *For simplicity, we analyzed `GenericBBL` in the realizable setting, i.e., under the*  
 359 *assumption that the training set  $S$  is consistent with the target class  $C$ . Our construction carries*  
 360 *over to the agnostic setting via standard arguments (ignoring computational efficiency). We*  
 361 *refer the reader to [Beimel et al., 2021] and [Alon et al., 2020] for generic agnostic-to-realizable*  
 362 *reductions in the context of private learning.*

363 **References**

- 364 Noga Alon, Roi Livni, Maryanthe Malliaris, and Shay Moran. Private PAC learning implies  
365 finite littlestone dimension. In Moses Charikar and Edith Cohen, editors, *Proceedings of*  
366 *the 51st Annual ACM SIGACT Symposium on Theory of Computing, STOC 2019, Phoenix,*  
367 *AZ, USA, June 23-26, 2019*, pages 852–860. ACM, 2019. doi: 10.1145/3313276.3316312.  
368 URL <https://doi.org/10.1145/3313276.3316312>.
- 369 Noga Alon, Amos Beimel, Shay Moran, and Uri Stemmer. Closure properties for private  
370 classification and online prediction. In *COLT*, volume 125 of *Proceedings of Machine*  
371 *Learning Research*, pages 119–152. PMLR, 2020.
- 372 Raef Bassily, Abhradeep Guha Thakurta, and Om Dipakbhai Thakkar. Model-agnostic  
373 private learning. In *NeurIPS*, pages 7102–7112, 2018.
- 374 Amos Beimel, Kobbi Nissim, and Uri Stemmer. Characterizing the sample complexity of  
375 private learners. In *ITCS*, pages 97–110. ACM, 2013a.
- 376 Amos Beimel, Kobbi Nissim, and Uri Stemmer. Private learning and sanitization: Pure vs.  
377 approximate differential privacy. In *APPROX-RANDOM*, pages 363–378, 2013b.
- 378 Amos Beimel, Kobbi Nissim, and Uri Stemmer. Learning privately with labeled and  
379 unlabeled examples. *Algorithmica*, 83(1):177–215, 2021.
- 380 Gavin Brown, Mark Bun, Vitaly Feldman, Adam D. Smith, and Kunal Talwar. When is  
381 memorization of irrelevant training data necessary for high-accuracy learning? In *STOC*,  
382 pages 123–132. ACM, 2021.
- 383 Mark Bun and Mark Zhandry. Order-revealing encryption and the hardness of private  
384 learning. In *TCC (A1)*, volume 9562 of *Lecture Notes in Computer Science*, pages 176–206.  
385 Springer, 2016.
- 386 Mark Bun, Kobbi Nissim, Uri Stemmer, and Salil P. Vadhan. Differentially private release  
387 and learning of threshold functions. In *FOCS*, pages 634–649, 2015.
- 388 Mark Bun, Thomas Steinke, and Jonathan Ullman. Make up your mind: The price of online  
389 queries in differential privacy. *CoRR*, abs/1604.04618, 2016. URL <http://arxiv.org/abs/1604.04618>.
- 391 Edith Cohen, Xin Lyu, Jelani Nelson, Tamás Sarlós, and Uri Stemmer.  $\tilde{O}$ ptimal differentially  
392 private learning of thresholds and quasi-concave optimization. *CoRR*, abs/2211.06387,  
393 2022. doi: 10.48550/arXiv.2211.06387. URL [https://doi.org/10.48550/arXiv.2211.](https://doi.org/10.48550/arXiv.2211.06387)  
394 [06387](https://doi.org/10.48550/arXiv.2211.06387).
- 395 Yuval Dagan and Vitaly Feldman. PAC learning with stable and private predictions. In  
396 *COLT*, volume 125 of *Proceedings of Machine Learning Research*, pages 1389–1410. PMLR,  
397 2020.
- 398 Cynthia Dwork and Vitaly Feldman. Privacy-preserving prediction. In Sébastien Bubeck,  
399 Vianney Perchet, and Philippe Rigollet, editors, *Conference On Learning Theory, COLT*  
400 *2018, Stockholm, Sweden, 6-9 July 2018*, volume 75 of *Proceedings of Machine Learning*  
401 *Research*, pages 1693–1702. PMLR, 2018. URL [http://proceedings.mlr.press/v75/](http://proceedings.mlr.press/v75/dwork18a.html)  
402 [dwork18a.html](http://proceedings.mlr.press/v75/dwork18a.html).
- 403 Cynthia Dwork, Frank McSherry, Kobbi Nissim, and Adam Smith. Calibrating noise to  
404 sensitivity in private data analysis. In *TCC*, pages 265–284, 2006.
- 405 Cynthia Dwork, Guy N. Rothblum, and Salil P. Vadhan. Boosting and differential privacy.  
406 In *FOCS*, pages 51–60, 2010.
- 407 Vitaly Feldman and David Xiao. Sample complexity bounds on differentially private  
408 learning via communication complexity. *SIAM J. Comput.*, 44(6):1740–1764, 2015. doi:  
409 10.1137/140991844. URL <http://dx.doi.org/10.1137/140991844>.

- 410 Haim Kaplan, Katrina Ligett, Yishay Mansour, Moni Naor, and Uri Stemmer. Privately  
411 learning thresholds: Closing the exponential gap. In *COLT*, volume 125 of *Proceedings of*  
412 *Machine Learning Research*, pages 2263–2285. PMLR, 2020.
- 413 Shiva Prasad Kasiviswanathan, Homin K. Lee, Kobbi Nissim, Sofya Raskhodnikova, and  
414 Adam Smith. What can we learn privately? *SIAM J. Comput.*, 40(3):793–826, 2011.
- 415 Michael J. Kearns, Mallesh M. Pai, Ryan M. Rogers, Aaron Roth, and Jonathan R. Ullman.  
416 Robust mediators in large games. *CoRR*, abs/1512.02698, 2015.
- 417 Frank McSherry and Kunal Talwar. Mechanism design via differential privacy. In *FOCS*,  
418 pages 94–103. IEEE, Oct 20–23 2007.
- 419 Anupama Nandi and Raef Bassily. Privately answering classification queries in the agnostic  
420 PAC model. In *ALT*, volume 117 of *Proceedings of Machine Learning Research*, pages  
421 687–703. PMLR, 2020.
- 422 L. G. Valiant. A theory of the learnable. *Commun. ACM*, 27(11):1134–1142, November 1984.  
423 ISSN 0001-0782. doi: 10.1145/1968.1972. URL [http://doi.acm.org/10.1145/1968.](http://doi.acm.org/10.1145/1968.1972)  
424 [1972](http://doi.acm.org/10.1145/1968.1972).
- 425 Vladimir N. Vapnik and Alexey Y. Chervonenkis. On the uniform convergence of relative  
426 frequencies of events to their probabilities. *Theory of Probability and its Applications*, 16  
427 (2):264–280, 1971.

428 **A Additional Preliminaries from PAC Learning**

429 It is well known that a sample of size  $\Theta(\text{VC}(C))$  is necessary and sufficient for the PAC  
 430 learning of a concept class  $C$ , where the Vapnik-Chervonenkis (VC) dimension of a class  $C$   
 431 is defined as follows:

432 **Definition A.1** (VC-Dimension [Vapnik and Chervonenkis, 1971]). Let  $C$  be a concept class  
 433 over a domain  $X$ . For a set  $B = \{b_1, \dots, b_\ell\} \subseteq X$  of  $\ell$  points, let  $\Pi_C(B) = \{(c(b_1), \dots, c(b_\ell)) : c \in C\}$   
 434 be the set of all dichotomies that are realized by  $C$  on  $B$ . We say that the set  $B \subseteq X$  is *shattered*  
 435 by  $C$  if  $C$  realizes all possible dichotomies over  $B$ , in which case we have  $|\Pi_C(B)| = 2^{|B|}$ .

436 The VC dimension of the class  $C$ , denoted  $\text{VC}(C)$ , is the cardinality of the largest set  $B \subseteq X$   
 437 shattered by  $C$ .

438 **Theorem A.2** (VC bound). *Let  $C$  be a concept class over a domain  $X$ . For  $\alpha, \beta < 1/2$ , there  
 439 exists an  $(\alpha, \beta, n)$ -PAC learner for  $C$ , where  $n = \frac{8\text{VC}(C)\log(\frac{13}{\alpha}) + 4\log(\frac{2}{\beta})}{\alpha}$ .*

440 **B Proof of Theorem 3.3**

441 The proof of Theorem 3.3 follows from algorithms HypothesisLearner, AccuracyBoost  
 442 and claims B.1, B.2, all described below.

443 In Algorithm HypothesisLearner we assume that the everlasting differentially private  
 444 prediction interface  $\mathcal{A}$  was fed with  $n$  i.i.d. samples taken from some (unknown) distribution  
 445  $\mathcal{D}$  and labeled by an unknown concept  $c \in C$ . Assuming the sequence of hypotheses  $\{h_r\}_{r \geq 0}$   
 446 produced by  $\mathcal{A}$  satisfies

$$\forall r \text{ error}_{\mathcal{D}}(c, h_r) \leq \alpha \quad (1)$$

447 we use it to construct – with constant probability – a hypothesis  $h$  with error bounded by  
 448  $O(\alpha)$ .

---

**Algorithm HypothesisLearner**

---

**Parameters:**  $0 < \beta \leq 1/8$ ,  $R = \lceil |X| \log(|X|) \log(1/\beta) \rceil$

**Input:** hypothesis sequence  $\{h_r\}_{r \geq 0}$

1. for all  $x \in X$  let  $L_x = \emptyset$
  2. for  $r = 0, 1, 2, \dots, R$ 
    - (a) select  $x$  uniformly at random from  $X$  and let  $L_x = L_x \cup \{h_r(x)\}$
  3. if  $L_x = \emptyset$  for some  $x \in X$  then fail, output an arbitrary hypothesis, and halt  
 /\*  $\Pr[\exists x \text{ such that } L_x = \emptyset] \leq |X|(1 - \frac{1}{|X|})^R \approx |X|e^{-R/|X|} = \beta$  \*/
  4. for all  $x \in X$  let  $r_x$  be sampled uniformly at random from  $L_x$
  5. construct the hypothesis  $h$ , where  $h(x) = r_x$
- 

449 **Claim B.1.** *If executed on a hypothesis sequence satisfying Equation 1 then with probability at  
 450 least 3/4 Algorithm HypothesisLearner outputs a hypothesis  $h$  satisfying  $\text{error}_{\mathcal{D}}(c, h) \leq 8\alpha$ .*

451 *Proof.* Having  $\mathcal{D}, c \in C$  fixed, and given a hypothesis  $h$ , we define  $e_h(x)$  to be 1 if  $h(x) \neq c(x)$   
 452 and 0 otherwise. Thus, we can write  $\text{error}_{\mathcal{D}}(c, h) = \mathbb{E}_{x \sim \mathcal{D}}[e_h(x)]$ .

453 Observe that when Algorithm HypothesisLearner does not fail,  $r_x$  (and hence  $h(x)$ ) is cho-  
 454 sen with equal probability among  $(h_1(x), h_2(x), \dots, h_R(x))$  and hence  $\mathbb{E}_{\theta}[e_h(x)] = \mathbb{E}_{i \in [R]}[e_{h_i}(x)]$   
 455 where  $\theta$  denotes the randomness of HypothesisLearner. We get:

$$\begin{aligned} \mathbb{E}_{\theta}[\text{error}_{\mathcal{D}}(c, h)] &= \mathbb{E}_{\theta}[\mathbb{E}_{x \sim \mathcal{D}}[e_h(x)]] = \mathbb{E}_{x \sim \mathcal{D}}[\mathbb{E}_{\theta}[e_h(x)]] \\ &= \mathbb{E}_{x \sim \mathcal{D}}[\mathbb{E}_{i \in [R]}[e_{h_i}(x)]] = \mathbb{E}_{i \in [R]}[\mathbb{E}_{x \sim \mathcal{D}}[e_{h_i}(x)]] \\ &\leq \mathbb{E}_{i \sim \mathcal{R}}[\alpha] = \alpha. \end{aligned}$$

456 By Markov inequality, we have  $\Pr_{\theta}[\text{error}_{\mathcal{D}}(c, h) \geq 8\alpha] \leq 1/8$ . The claim follows noting that  
 457 Algorithm HypothesisLearner fails with probability at most  $\beta \leq 1/8$ .  $\square$

458 The second part of the transformation is Algorithm AccuracyBoost that applies Algorithm  
 459 HypothesisLearner  $O(\log(1/\beta))$  times to obtain with high probability a hypothesis with  
 460  $O(\alpha)$  error.

---

**Algorithm AccuracyBoost**

---

**Parameters:**  $\beta, R = 104 \ln \frac{1}{\beta}$

**Input:**  $R$  labeled samples with  $n$  examples each  $(S_1, \dots, S_R)$  where  $S_i \in (X \times \{0, 1\})^n$

1. for  $i = 1, 2 \dots R$ 
    - (a) execute  $\mathcal{A}(S_i)$  to obtain a hypothesis sequence  $\{h_r^i\}_{r \geq 0}$
    - (b) execute Algorithm WeakHypothesisLearner on  $\{h_r^i\}_{r \geq 0}$  to obtain hypothesis  $h^i$
  2. construct the hypothesis  $\hat{h}$ , where  $\hat{h}(x) = \text{maj}(h^1(x), \dots, h^R(x))$ .
- 

461 **Claim B.2.** *With probability  $1 - \beta$ , Algorithm AccuracyBoost output a  $24\alpha$ -good hypothesis*  
 462 *over distribution  $\mathcal{D}$ .*

*Proof.* Define  $B_i$  to be the event where the sequence of hypotheses  $\{h_r^i\}_{r \geq 0}$  produced in Step 1a of AccuracyBoost does not satisfy Equation 1. We have,

$$\Pr[\text{error}_{\mathcal{D}}(c, h_i) > 8\alpha] \leq \Pr[B] + (1 - \Pr[B]) \cdot \Pr[\text{error}_{\mathcal{D}}(c, h) > 8\alpha] \leq \beta + 1/4 < 3/8.$$

463 Hence, by the Chernoff bound, when  $R \geq 104 \ln \frac{1}{\beta}$ , we have at least  $7R/8$  hypotheses are  
 464  $8\alpha$ -good over distribution  $\mathcal{D}$ . Consider the worst case, in which  $R/8$  hypotheses always  
 465 output wrong labels. To output a wrong label of  $x$ , we require at least  $3R/8$  hypotheses to  
 466 output wrong labels. Thus  $\hat{h}$  is  $24\alpha$ -good over distribution  $\mathcal{D}$ .  $\square$

## 467 C Tools from Prior Works

### 468 C.1 Algorithm LabelBoost [Beimel et al., 2021]

---

**Algorithm LabelBoost [Beimel et al., 2021]**

---

**Parameters:** A concept class  $C$ .

**Input:** A partially labeled database  $S \circ T \in (X \times \{0, 1, \perp\})^*$ .

% We assume that the first portion of the database (denoted  $S$ ) contains labeled examples.  
 The algorithm outputs a similar database where both  $S$  and  $T$  are (re)labeled.

1. Initialize  $H = \emptyset$ .
  2. Let  $P = \{p_1, \dots, p_\ell\}$  be the set of all points  $p \in X$  appearing at least once in  $S \circ T$ .  
 Let  $\Pi_C(P) = \{(c(p_1), \dots, c(p_\ell)) : c \in C\}$  be the set of all dichotomies generated by  $C$  on  $P$ .
  3. For every  $(z_1, \dots, z_\ell) \in \Pi_C(P)$ , add to  $H$  an arbitrary concept  $c \in C$  s.t.  $c(p_i) = z_i$  for every  $1 \leq i \leq \ell$ .
  4. Choose  $h \in H$  using the exponential mechanism with privacy parameter  $\epsilon=1$ , solution set  $H$ , and the database  $S$ .
  5. (Re)label  $S \circ T$  using  $h$ , and denote the resulting database  $(S \circ T)^h$ , that is, if  $S \circ T = (x_i, y_i)_{i=1}^t$  then  $(S \circ T)^h = (x_i, y'_i)_{i=1}^t$  where  $y'_i = h(x_i)$ .
  6. Output  $(S \circ T)^h$ .
- 

469 **Lemma C.1** (privacy of Algorithm LabelBoost [Beimel et al., 2021]). *Let  $\mathcal{A}$  be an  $(\epsilon, \delta)$ -*  
 470 *differentially private algorithm operating on partially labeled databases. Construct an algorithm*  
 471  *$\mathcal{B}$  that on input a partially labeled database  $S \circ T \in (X \times \{0, 1, \perp\})^*$  applies  $\mathcal{A}$  on the outcome of*  
 472 *LabelBoos( $S \circ T$ ). Then,  $\mathcal{B}$  is  $(\epsilon + 3, 4\epsilon\delta)$ -differentially private.*

473 Consider an execution of `LabelBoost` on a database  $S \circ T$ , and assume that the examples in  
474  $S$  are labeled by some target concept  $c \in C$ . Recall that for every possible labeling  $\vec{z}$  of the  
475 elements in  $S$  and in  $T$ , algorithm `LabelBoost` adds to  $H$  a hypothesis from  $C$  that agrees  
476 with  $\vec{z}$ . In particular,  $H$  contains a hypothesis that agrees with the target concept  $c$  on  $S$   
477 (and on  $T$ ). That is,  $\exists f \in H$  s.t.  $\text{error}_S(f) = 0$ . Hence, the exponential mechanism (on Step 4)  
478 chooses (w.h.p.) a hypothesis  $h \in H$  s.t.  $\text{error}_S(h)$  is small, provided that  $|S|$  is roughly  $\log|H|$ ,  
479 which is roughly  $\text{VC}(C) \cdot \log(|S| + |T|)$  by Sauer’s lemma. So, algorithm `LabelBoost` takes an  
480 input database where only a small portion of it is labeled, and returns a similar database in  
481 which the labeled portion grows exponentially.

**Lemma C.2** (utility of Algorithm `LabelBoost` [Beimel et al., 2021]). *Fix  $\alpha$  and  $\beta$ , and let  $S \circ T$  be s.t.  $S$  is labeled by some target concept  $c \in C$ , and s.t.*

$$|T| \leq \frac{\beta}{e} \text{VC}(C) \exp\left(\frac{\alpha|S|}{2\text{VC}(C)}\right) - |S|.$$

482 *Consider the execution of `LabelBoost` on  $S \circ T$ , and let  $h$  denote the hypothesis chosen on Step 4.*  
483 *With probability at least  $(1 - \beta)$  we have that  $\text{error}_S(h) \leq \alpha$ .*

## 484 C.2 Algorithm `BetweenThresholds` [Bun et al., 2016]

---

**Algorithm `BetweenThresholds`** [Bun et al., 2016]

---

**Input:** Database  $S \in X^n$ .

**Parameters:**  $\varepsilon, t_\ell, t_u \in (0, 1)$  and  $n, k \in \mathbb{N}$ .

1. Sample  $\mu \sim \text{Lap}(2/\varepsilon n)$  and initialize noisy thresholds  $\hat{t}_\ell = t_\ell + \mu$  and  $\hat{t}_u = t_u - \mu$ .
  2. For  $j = 1, 2, \dots, k$ :
    - (a) Receive query  $q_j : X^n \rightarrow [0, 1]$ .
    - (b) Set  $c_j = q_j(S) + v_j$  where  $v_j \sim \text{Lap}(6/\varepsilon n)$ .
    - (c) If  $c_j < \hat{t}_\ell$ , output L and continue.
    - (d) If  $c_j > \hat{t}_u$ , output R and continue.
    - (e) If  $c_j \in [\hat{t}_\ell, \hat{t}_u]$ , output  $\top$  and halt.
- 

485 **Lemma C.3** (Privacy for `BetweenThresholds` [Bun et al., 2016]). *Let  $\varepsilon, \delta \in (0, 1)$  and  $n \in \mathbb{N}$ .*  
486 *Then algorithm `BetweenThresholds` is  $(\varepsilon, \delta)$ -differentially private for any adaptively-chosen*  
487 *sequence of queries as long as the gap between the thresholds  $t_\ell, t_u$  satisfies*

$$t_u - t_\ell \geq \frac{12}{\varepsilon n} (\log(10/\varepsilon) + \log(1/\delta) + 1).$$

488 **Lemma C.4** (Accuracy for `BetweenThresholds` [Bun et al., 2016]). *Let  $\alpha, \beta, \varepsilon, t_\ell, t_u \in (0, 1)$*   
489 *and  $n, k \in \mathbb{N}$  satisfy*

$$n \geq \frac{8}{\alpha \varepsilon} (\log(k + 1) + \log(1/\beta)).$$

490 *Then, for any input  $x \in X^n$  and any adaptively-chosen sequence of queries  $q_1, q_2, \dots, q_k$ , the*  
491 *answers  $a_1, a_2, \dots, a_{\leq k}$  produced by `BetweenThresholds` on input  $x$  satisfy the following with*  
492 *probability at least  $1 - \beta$ . For any  $j \in [k]$  such that  $a_j$  is returned before `BetweenThresholds`*  
493 *halts,*

- 494 •  $a_j = \text{L} \implies q_j(x) \leq t_\ell + \alpha,$
- 495 •  $a_j = \text{R} \implies q_j(x) \geq t_u - \alpha,$  and
- 496 •  $a_j = \top \implies t_\ell - \alpha \leq q_j(x) \leq t_u + \alpha.$

497 **Observation 2.** *Using standard composition theorems for differential privacy (see, e.g., Dwork*  
498 *et al. [2010]), we can assume that algorithm `BetweenThresholds` takes another parameter  $c$ ,*  
499 *and halts after  $c$  times of outputting  $\top$ . In this case, the algorithm satisfies  $(\varepsilon', 2c\delta)$ -differential*  
500 *privacy, for  $\varepsilon' = \sqrt{2c \ln(\frac{1}{c\delta})} \varepsilon + c\varepsilon(e^\varepsilon - 1)$ .*

501 **D Some Technical Facts**

502 We refer to the execution of steps 3a-3g of algorithm `GenericBBL` as a *phase* of the algorithm,  
 503 indexed by  $i = 1, 2, 3, \dots$

504 The original `BetweenThresholds` needs to halt when it outputs  $\top$ . In `GenericBBL`, we toler-  
 505 ance it to halt at most  $c_i$  times in the phase  $i$ . We prove `BetweenThresholds` in `GenericBBL`  
 506 is  $(1, \delta)$ -differentially private.

507 **Claim D.1.** For  $\delta < 1$ , Mechanism `BetweenThresholds` used in step 3c in the  $i$ -th iteration, is  
 508  $(1, \delta)$ -differentially private.

*Proof.* Let  $\epsilon'_i, \delta'_i$  be as in Step 3c. Since  $e^{\epsilon'_i} - 1 < 2\epsilon'_i$  for  $0 < \epsilon'_i < 1$ , we have

$$\sqrt{2c_i \ln\left(\frac{1}{c_i \delta'_i}\right) \cdot \epsilon'_i + c_i \epsilon'_i (e^{\epsilon'_i} - 1)} \leq \sqrt{2c_i \ln\left(\frac{2}{\delta}\right) \cdot \epsilon'_i + 2c_i \epsilon_i'^2} = \frac{\sqrt{2}}{3} + \frac{2}{9 \ln\left(\frac{2}{\delta}\right)} \leq 1.$$

509 The proof is concluded by using observation 2. □

510 In Claim D.2- D.5, we prove that with high probability, `BetweenThresholds` in step 3d halts  
 511 within  $64\alpha_i$  times. We prove it by 4 steps:

- 512 1. prove that with high probability, most hypothesis in step 3b have high accuracy  
 513 (Claim D.2).
- 514 2. prove that if most hypothesis in step 3b have high accuracy, then with high probability,  
 515 the queries in `BetweenThresholds` are closed to 0 or 1 (Claim D.3).
- 516 3. prove that if the queries in `BetweenThresholds` are closed to 0 or 1, then  
 517 `BetweenThresholds` in step 3d will outputs  $L$  or  $R$  with high probability (Claim D.4).
- 518 4. prove that if `BetweenThresholds` outputs  $L$  or  $R$ , then every single phase fails with low  
 519 probability (Claim D.5).

520 **Claim D.2.** If  $\beta_i \leq 1/32$  and  $T_i \geq 96 \ln \frac{1}{\alpha_i}$ , then with probability  $1 - \alpha_i$ ,  $\frac{15T_i}{16}$  hypotheses in step 3b  
 521 are  $\alpha_i$ -good with respect to  $g_i$ , where  $g_i$  is the concept of  $S_i$ .

*Proof.* By the VC bound (Theorem A.2), for each  $t \in [T_i]$ , we have

$$\Pr[\text{error}_{\mathcal{D}}(f_t, g_i) \leq \alpha_i] \geq 1 - \beta_i.$$

522 By Chernoff bound, if  $T_i \geq \frac{16+256\beta_i}{(1-16\beta_i)^2} \ln \frac{1}{\alpha_i}$ , then with probability  $1 - \alpha_i$ , we have  $\frac{15T_i}{16}$  hypothe-  
 523 ses have  $\text{error}_{\mathcal{D}}(f_t, g_i) \leq \alpha_i$ . When  $\beta_i \leq 1/32$ , it is sufficient to set  $T_i \geq 96 \ln \frac{1}{\alpha_i}$ . □

524 **Claim D.3.** If  $\alpha_i \leq 1/16$  and  $\frac{15T_i}{16}$  hypotheses in step 3b are  $\alpha_i$ -good with respect to  $g_i$ , where  $g_i$   
 525 is the concept of  $S_i$ , then  $\Pr_{x \sim \mathcal{D}}[|q(x) - \frac{1}{2}| \leq \frac{3}{8}] \leq 15\alpha_i$ .

526 *Proof.* W.l.o.g. assume  $g_i(x) = 1$ , where  $g_i$  is the concept of  $S_i$ , so it is sufficient to prove  
 527  $\Pr_{x \sim \mathcal{D}}[q(x) \leq \frac{7}{8}] \leq 8\alpha_i$ . Consider the worst case that  $\frac{T_i}{16}$  "bad" hypotheses output 0. In that  
 528 case,  $q(x) \leq \frac{7}{8}$  when  $\frac{T_i}{16}$  of  $\alpha_i$ -good hypotheses output 0. So that with probability  $15\alpha_i$ , we  
 529 have  $q(x) \leq \frac{7}{8}$ . (see Figure 2)

530 □

531 **Claim D.4.** Let  $t_u < 1/2 + 1/8$  and  $t_\ell > 1/2 - 1/8$ . For a query  $q$  such that  $q(S) > 7/8$  (similarly,  
 532 for  $q(S) < 1/8$ ), Algorithm `BetweenThresholds` outputs  $R$  (similarly,  $L$ ) with probability at least

533  $1 - \exp\left(-\frac{T_i}{144 \sqrt{c_i \ln\left(\frac{2}{\delta}\right)}}\right).$

534 *Proof.* Wlog assume  $q(S) > 7/8$ , it is sufficient to show

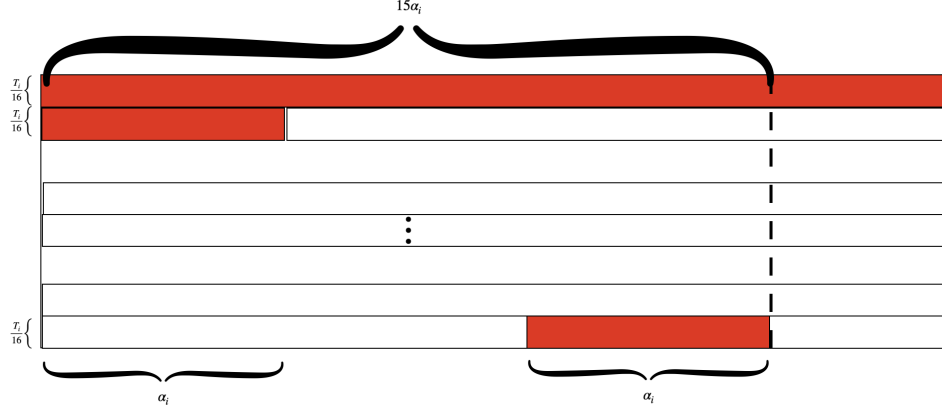

Figure 2: The horizontal represents the input point. The vertical represents the hypothesis. The red parts represent the incorrect prediction. We let  $\frac{T_i}{16}$  hypothesis predict all labels as 0. To let  $q(x) \leq \frac{7}{8}$ , there must exist  $\frac{T_i}{16}$  hypothesis output 0. In the worst case, at most  $15\alpha_i$  of points are labeled as 0.

$$\begin{aligned}
\Pr[\text{BetweenThreshold outputs } R] &= \Pr[q(S) + \text{Lap}(6/\varepsilon' T_i) > t_u + \text{Lap}(2/\varepsilon' T_i)] \\
&> \Pr[\text{Lap}(6/\varepsilon' T_i) > -1/8] \cdot \Pr[\text{Lap}(2/\varepsilon' T_i) < 1/8] \\
&= \left(1 - \frac{1}{2} \exp\left(-\frac{T_i}{144\sqrt{c_i \ln(\frac{2}{\delta})}}\right)\right) \cdot \left(1 - \frac{1}{2} \exp\left(-\frac{T_i}{48\sqrt{c_i \ln(\frac{2}{\delta})}}\right)\right) \\
&> 1 - \exp\left(-\frac{T_i}{144\sqrt{c_i \ln(\frac{2}{\delta})}}\right).
\end{aligned}$$

535

□

536 **Claim D.5.** For any phase  $i$ , *BetweenThresholds* outputs  $\top$  at most  $64\alpha_i R_i$  times with proba-  
537 bility at most  $\beta_i$ .

538 *Proof.* For a single query, if  $t_u < 1/2 + 1/8$  and  $q(S) > 7/8$  (similarly,  $t_\ell > 1/2 - 1/8$   
539 and  $q(S) < 1/8$ ), by Claim D.4, *BetweenThresholds* outputs  $\top$  with probability at

540 most  $\exp\left(-\frac{T_i}{144\sqrt{c_i \ln(\frac{2}{\delta})}}\right) = \exp\left(-\frac{T_i}{144\sqrt{64\alpha_i R_i \ln(\frac{2}{\delta})}}\right) < \alpha_i$ . Combine Claim D.2 and D.3,

541 *BetweenThresholds* outputs  $\top$  with probability at most  $32\alpha_i$ . By the Chernoff bound

542 and  $R_i \geq \frac{3\ln(\frac{1}{\beta_i})}{\alpha_i}$ , *BetweenThresholds* outputs  $\top$  more than  $64\alpha_i R_i$  times with probability

543 at most  $\beta_i$ . □

544 In step 3f, *GenericBBL* takes a random subset of size  $\lambda_{i+1} T_{i+1}$  from  $\hat{D}'_i$ . We show that the  
545 size of  $\hat{D}'_i$  is at least  $\lambda_{i+1} T_{i+1}$ .

546 **Claim D.6.** When  $\varepsilon \leq 1$ , for any  $i \geq 1$ , we always have  $|\hat{D}'_i| \geq \lambda_{i+1} T_{i+1}$ .

547 *Proof.* Let  $m = 3 + \exp(\varepsilon + 4) < 200$ . By the step 3c, step 3e and step 3f,  $|\hat{D}_j| = \frac{\varepsilon |D_j|}{m} = \frac{25600 |S_j|}{m} \geq$   
548  $128 |S_j| = 128 \lambda_j T_j$ . Then it is sufficient to verify  $128 \lambda_j T_j \geq \lambda_{j+1} T_{j+1}$



We can verify that

$$4\lambda_j = 4 \cdot \frac{8\text{VC}(C)\log(\frac{13}{\alpha_i}) + 4\log(\frac{2}{\beta_i})}{\alpha_i} = 4 \cdot \frac{8\text{VC}(C)(\log(\frac{13}{\alpha_{j+1}}) - 1) + 4(\log(\frac{2}{\beta_{j+1}}) - 1)}{2\alpha_{j+1}} \geq \lambda_{j+1}$$

and

$$32T_j = \frac{32\tau \cdot \lambda_i \cdot \log(\frac{1}{\delta}) \cdot \log^2(\frac{\lambda_i}{\varepsilon\alpha_i\beta_i\delta})}{\alpha_i\varepsilon} \geq \frac{32\tau \cdot \lambda_i \cdot \log(\frac{1}{\delta}) \cdot \log^2(\frac{\lambda_{i+1}}{16\varepsilon\alpha_{i+1}\beta_{i+1}\delta})}{8\alpha_{i+1}\varepsilon} \geq \lambda_{j+1}T_{j+1}.$$

549 The last inequality holds because  $\lambda_j \geq 4$  and  $\alpha_j, \beta_j \leq 1/2$ .  $\square$

550 To apply the privacy and accuracy of *LabelBoost* and *BetweenThresholds*, the sizes of the  
551 databases need to satisfy the inequalities in lemma C.2, C.3 and C.4. We verify that in each  
552 phase, the sizes of the databases always satisfy the requirement.

**Claim D.7.** *Let  $\alpha, \beta, \delta < 1/16$ ,  $\varepsilon \leq 1$ , and  $\text{VC}(C) \geq 1$ . Then for any  $i \geq 1$ , we have*

$$T_i \geq \frac{8}{\alpha_i\varepsilon'} (\log(|D_i| + 1) + \log(1/\beta_i)).$$

553 *Proof.* By claim D.6 and step 3c,  $|D_i| = \frac{25600|S_i|}{\varepsilon} = \frac{25600\lambda_i T_i}{\varepsilon}$ . Since

$$\begin{aligned} \frac{8}{\alpha_i\varepsilon'} (\log(|D_i| + 1) + \log(1/\beta_i)) &= \frac{24\sqrt{64\alpha_i|D_i|\ln(\frac{2}{\delta})}}{\sqrt{2}\alpha_i} \cdot (\log(|D_i| + 1) + \log(1/\beta_i)) \\ &= O\left(\sqrt{\frac{\lambda_i T_i \log(\frac{1}{\delta})}{\alpha_i\varepsilon}} \left(\log\left(\frac{\lambda_i T_i}{\varepsilon\beta_i}\right)\right)\right) \\ &= O\left(\sqrt{\frac{\lambda_i T_i \log(\frac{1}{\delta})}{\alpha_i\varepsilon}} \cdot \log\left(\frac{\lambda_i \log(\frac{1}{\delta})}{\alpha_i\beta_i\varepsilon}\right)\right), \end{aligned}$$

554 and  $T_i = \frac{\tau \cdot \lambda_i \cdot \log(\frac{1}{\delta}) \cdot \log^2(\frac{\lambda_i}{\varepsilon\alpha_i\beta_i\delta})}{\alpha_i\varepsilon}$ , where  $\tau \geq 1.1 * 10^{10}$ , the inequality always holds.  $\square$

555 **Claim D.8.** *When  $\varepsilon \leq 1$ , for any  $i \geq 1$ , we have  $|\hat{D}_i| \leq \frac{\beta_i}{\varepsilon} \text{VC}(C) \exp\left(\frac{\alpha_i|\hat{S}_i|}{2\text{VC}(C)}\right) - |\hat{S}_i|$ .*

*Proof.* By claim D.6, step 3c and step 3f,

$$|\hat{D}_i| = \frac{\varepsilon|D_i|}{m} = O(\lambda_i T_i) = O\left(\text{VC}(C)\log^2(\text{VC}(C)) \cdot \text{poly}\left(\frac{1}{\alpha_i}, \log\left(\frac{1}{\beta_i}\right), \frac{1}{\varepsilon}, \log\left(\frac{1}{\delta}\right)\right)\right)$$

556 and

$$\begin{aligned} |\hat{S}_i| &= \frac{\varepsilon|S_i|}{m} \\ &= O(\varepsilon\lambda_i T_i) = O(\lambda_i T_i) \\ &= O\left(\text{VC}(C)\log^2(\text{VC}(C)) \cdot \text{poly}\left(\frac{1}{\alpha_i}, \log\left(\frac{1}{\beta_i}\right), \frac{1}{\varepsilon}, \log\left(\frac{1}{\delta}\right)\right)\right). \end{aligned} \tag{2}$$

Note that

$$\frac{\beta_i}{\varepsilon} \text{VC}(C) \exp\left(\frac{\alpha_i|\hat{S}_i|}{2\text{VC}(C)}\right) = \Omega\left(\text{VC}^2(C) \cdot \exp\left(\text{poly}\left(\frac{1}{\alpha_i}, \log\left(\frac{1}{\beta_i}\right), \frac{1}{\varepsilon}, \log\left(\frac{1}{\delta}\right)\right)\right)\right),$$

557 for  $T_i = \frac{\tau \cdot \lambda_i \cdot \log(\frac{1}{\delta}) \cdot \log^2(\frac{\lambda_i}{\varepsilon\alpha_i\beta_i\delta})}{\alpha_i\varepsilon}$ , the inequality holds when  $\tau \geq 1$ .  $\square$

558 **Claim D.9.** For every  $i \geq 1$ , we have

$$t_u - t_\ell \geq \frac{12}{\varepsilon'_i T_i} \left( \log(10/\varepsilon'_i) + \log(1/\delta'_i) + 1 \right).$$

*Proof.* By step 3c,  $t_u - t_\ell = 2\alpha_i$ . Then we have

$$\begin{aligned} \frac{6}{\alpha_i \varepsilon'_i T_i} \left( \log(10/\varepsilon'_i) + \log(1/\delta'_i) + 1 \right) &= \frac{6\sqrt{64\alpha_i R_i \ln(\frac{2}{\delta})}}{\alpha_i T_i} \left( \log(10/\varepsilon'_i) + \log(1/\delta'_i) + 1 \right) \\ &= 6\sqrt{\frac{1638400 \ln(\frac{2}{\delta}) \lambda_i}{\alpha_i T_i}} \left( \log(10/\varepsilon'_i) + \log(1/\delta'_i) + 1 \right) \\ &= 6\sqrt{\frac{1638400 \ln(\frac{2}{\delta})}{\tau \log(\frac{1}{\delta}) \log^2(\frac{\lambda_i}{\varepsilon \alpha_i \beta_i \delta})}} \left( \log(10/\varepsilon'_i) + \log(1/\delta'_i) + 1 \right) \\ &= O(1), \end{aligned}$$

559 the inequality holds when  $\tau > 10^{10}$ . □

## 560 E Accuracy of Algorithm GenericBBL – proof of Theorem 5.2

561 We refer to the execution of steps 3a-3g of algorithm GenericBBL as a *phase* of the algorithm,  
562 indexed by  $i = 1, 2, 3, \dots$

563 We give some technical facts in Appendix D. In Claim E.1, we show that in each phase,  
564 samples are labeled with high accuracy. In Claim E.2, we prove that algorithm GenericBBL  
565 fails with low probability. In Claim E.4, we prove that algorithm GenericBBL predict the  
566 labels with high accuracy.

**Claim E.1.** When Algorithm GenericBBL does not fail on phases 1 to  $i$ , then for phase  $i + 1$  we have

$$\Pr \left[ \exists g_{i+1} \in C \text{ s.t. } \text{error}_{S_{i+1}}(g_{i+1}) = 0 \text{ and } \text{error}_{\mathcal{D}}(g_{i+1}, c) \leq \sum_{j=1}^{i+1} \alpha_j \right] \geq 1 - 2 \sum_{j=0}^{i+1} \beta_j.$$

567 *Proof.* The proof is by induction on  $i$ . The base case for  $i = 1$  is trivial, with  $g_1 = c$ . Assume  
568 the claim holds for all  $j \leq i$ . By the properties of LabelBoost (Lemma C.2) and Claim D.8,  
569 with probability at least  $1 - \beta_{i+1}$  we have that  $S_{i+1}$  is labeled by a hypothesis  $g_{i+1} \in C$  s.t.  
570  $\text{error}_{S_i}(g_i, g_{i+1}) \leq \alpha_{i+1}$ . Observe that the points in  $S_i$  (without their labels) are chosen i.i.d.  
571 from  $\mathcal{D}$ , and hence, By Theorem A.2 (VC bounds) and  $|S_i| \geq 128\lambda_i \geq \lambda_{i+1}$ , with probability at  
572 least  $1 - \beta_{i+1}$  we have that  $\text{error}_{\mathcal{D}}(g_i, g_{i+1}) \leq \alpha_{i+1}$ . Hence, with probability  $1 - 2\beta_{i+1}$ , we have  
573  $\text{error}_{\mathcal{D}}(g_i, g_{i+1}) \leq \alpha_{i+1}$ . Finally, by the triangle inequality,  $\text{error}_{\mathcal{D}}(g_{i+1}, c) \leq \sum_{j=1}^{i+1} \alpha_j$ , except  
574 with probability  $2 \sum_{j=1}^{i+1} \beta_j$  □

575 Define the following good event.

576 **Event  $E_1$ :** Algorithm GenericBBL never fails on the execution of  
BetweenThresholds in step 3(d)iv.

577 **Claim E.2.** Event  $E_1$  occurs with probability at least  $1 - \beta$ .

*Proof.* Using to union bound and Claim D.5,

$$\Pr[\text{Event } E_1 \text{ occurs}] \geq 1 - \beta.$$

578 □

579 Combining claims E.1 and E.2, we get:

**Claim E.3.** Let  $\mathcal{D}$  be an underlying distribution and let  $c \in C$  be a target concept. Then

$$\Pr[\forall i \exists g_i \in C \text{ s.t. } \text{error}_{S_i}(g_i) = 0 \text{ and } \text{error}_{\mathcal{D}}(g_i, c) \leq \alpha] \geq 1 - 3\beta.$$

580 **Notations.** Consider the  $i$ th phase of Algorithm `GenericBBL`, and focus on the  $j$ -th iteration of Step 3. Fix all of the randomness in `BetweenThresholds`. Now observe that the output on step 3(d)iii is a deterministic function of the input  $x_{i,j}$ . This defines a hypothesis which we denote as  $h_{i,j}$ .

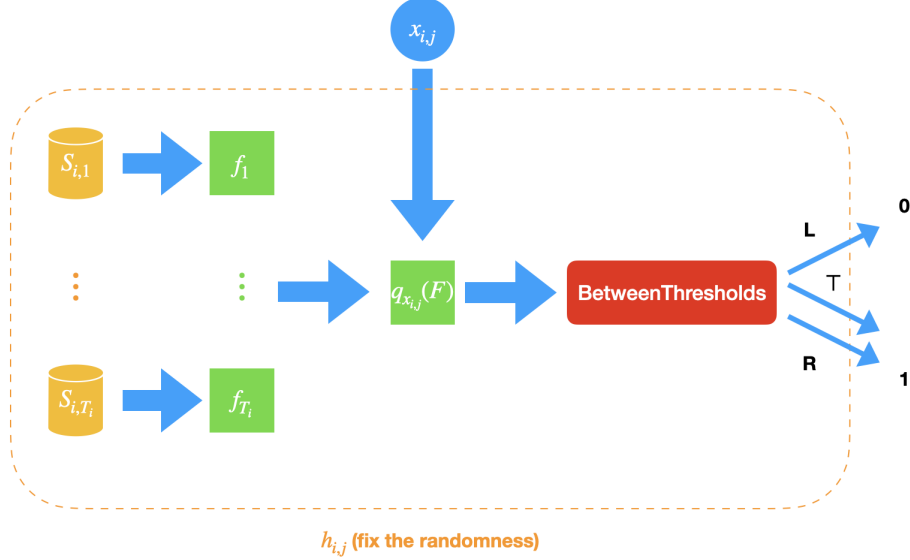

Figure 3: Hypothesis  $h_{i,j}$

584 **Claim E.4.** For  $\beta < 1/16$ , with probability at least  $1 - 4\beta$ , all of the hypotheses defined above are  
585  $6\alpha$ -good w.r.t.  $\mathcal{D}$  and  $c$ .

586 *Proof.* In the phase  $i$ , by Claim E.3, with probability at least  $1 - 3\beta$  we have that  $S_i$  is labeled  
587 by a hypothesis  $g_i \in C$  satisfying  $\text{error}_{\mathcal{D}}(g_i, c) \leq \alpha$ . We continue with the analysis assuming  
588 that this is the case.

589 On step 3a of the  $i$ th phase we divide  $S_i$  into  $T_i$  subsamples of size  $\lambda_i$  each, identify  
590 a consistent hypothesis  $f_t \in C$  for every subsample  $S_{i,t}$ , and denote  $F_i = (f_1, \dots, f_{T_i})$ . By  
591 Theorem A.2 (VC bounds), every hypothesis in  $F_i$  satisfies  $\text{error}_{\mathcal{D}}(f_t, g_i) \leq \alpha$  with probability  
592  $3/4$ , in which case, by the triangle inequality we have that  $\text{error}_{\mathcal{D}}(f_t, c) \leq 2\alpha$ .

593 Set  $T_i \geq \frac{512(1-4\beta_i)\ln(\frac{1}{\beta_i})}{(1-64\beta_i)^2}$ , using Chernoff bound, it holds that for at least  $15T_i/16$  of the hy-  
594 potheses in  $F_i$  have error  $\text{error}_{\mathcal{D}}(f_t, g_i) \leq 2\alpha$  with probability at least  $1 - \beta_i$ . These hypotheses  
595 have  $\text{error}_{\mathcal{D}}(f_t, c) \leq 3\alpha$ .

596 Let  $m : X \rightarrow \{0, 1\}$  defined as  $m(x) = \text{maj}_{f_t \in F_i}(f_t(x))$ . For  $m$  to err on a point  $x$  (w.r.t. the target  
597 concept  $c$ ), it must be that at least  $7/16$ -fraction of the  $3\alpha$ -good hypotheses in  $\hat{F}_i$  err on  $x$ .  
598 Consider the worst case in Figure 4, we have  $\text{error}_{\mathcal{D}}(m, c) \leq 6\alpha$

599 By Lemma C.4 and Claim D.7, with probability at least  $1 - \beta_i$ , all of the hypotheses defined  
600 during the  $i$ th iteration satisfy this condition, and are hence  $6\alpha$ -good w.r.t.  $c$  and  $\mathcal{D}$ . By the  
601 union bound, with probability  $1 - 4\beta$ , all the hypotheses are  $6\alpha$ -good.  $\square$

## 602 E.1 Privacy analysis – proof of Claim 5.3

603 Fix  $t \in \mathbb{N}$  and the adversary  $\mathcal{B}$ . We need to show that  $\text{View}_{\mathcal{B},t}^0$  and  $\text{View}_{\mathcal{B},t}^1$  (defined in  
604 Figure 1) are  $(\epsilon, \delta)$ -indistinguishable. We will consider separately the case where the  
605 executions differ in the training phase (Claim E.5) and the case where the difference occurs  
606 during the prediction phase (Claim E.6).

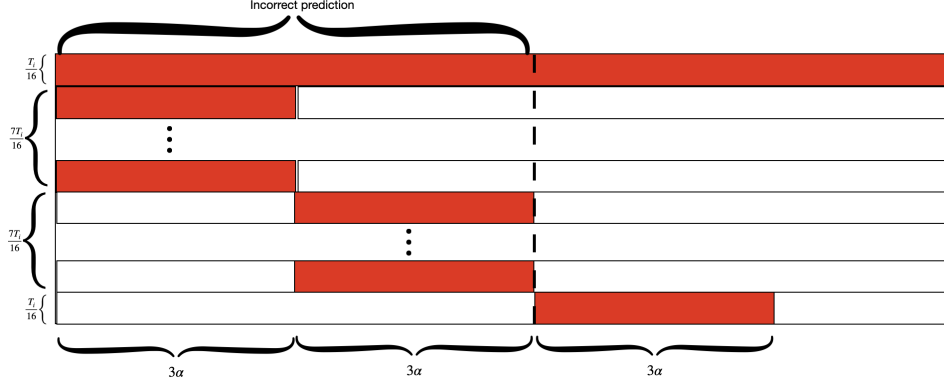

Figure 4: The horizontal represents the input point. The vertical represents the hypothesis. The red parts represent the incorrect prediction. We let  $\frac{T_i}{16}$  hypothesis predict all labels incorrectly. To output an incorrect label, there must exist  $\frac{7T_i}{16}$  hypothesis output the incorrect label. In the worst case, at most  $6\alpha$  of points are incorrectly classified.

607 **Privacy of the initial training set  $S$ .** Let  $S^0, S^1 \in (X \times \{0, 1\})^n$  be neighboring datasets of  
 608 labeled examples and let  $\text{View}_{\mathcal{B}, t}^0$  and  $\text{View}_{\mathcal{B}, t}^1$  be as in Figure 1 where  $((x_1^0, y_1^0), \dots, (x_n^0, y_n^0)) =$   
 609  $S^0$  and  $((x_1^1, y_1^1), \dots, (x_n^1, y_n^1)) = S^1$ .

610 **Claim E.5.** For all adversaries  $\mathcal{B}$ , for all  $t > 0$ , and for any two neighbouring database  $S^0$  and  $S^1$   
 611 selected by  $\mathcal{B}$ ,  $\text{View}_{\mathcal{B}, t}^0$  and  $\text{View}_{\mathcal{B}, t}^1$  are  $(\epsilon, \delta)$ -indistinguishable.

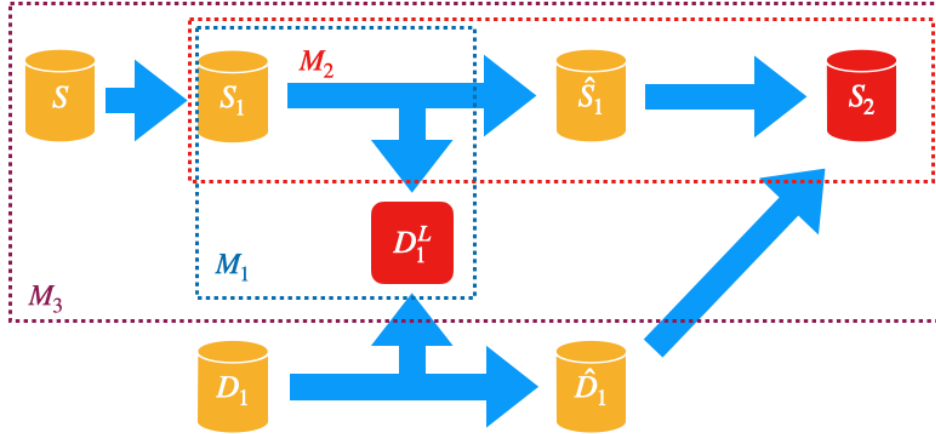

Figure 5: Privacy of the labeled sample  $S$

612 *Proof.* Let  $R'_1 = \min(t, R_1)$ . Note that  $\text{View}_{\mathcal{B}, R'_1}^b$  is a prefix of  $\text{View}_{\mathcal{B}, t}^b$  which includes the  
 613 labels Algorithm GenericBBL produces in Step 3(d)iii for the  $R'_1$  first unlabeled points  
 614 selected by  $\mathcal{B}$ . Let  $S_2^b$  be the result of the first application of algorithm LabelBoost in Step 3f  
 615 of GenericBBL (if  $t < R_1$  we set  $S_2^b$  as  $\perp$ ). The creation of these random variables is depicted  
 616 in Figure 5, where  $D_1^L$  denotes the labels Algorithm GenericBBL produces for the unlabeled  
 617 points  $D_1$ .

618 Observe that  $\text{View}_{\mathcal{B},t}^b$  results from a post-processing (jointly by the adversary  $\mathcal{B}$  and Algo-  
619 rithm `GenericBBL`) of the random variable  $(\text{View}_{\mathcal{B},R'_1}^b, S_2^b)$ , and hence it suffices to show that  
620  $(\text{View}_{\mathcal{B},R'_1}^0, S_2^0)$  and  $(\text{View}_{\mathcal{B},R'_1}^1, S_2^1)$  are  $(\epsilon, \delta)$ -indistinguishable.

621 We follow the processes creating  $\text{View}_{\mathcal{B},t}^b$  and  $S_2^b$  in Figure 5: (i) The mechanism  $M_1$  cor-  
622 responds to the loop in Step 3d of `GenericBBL` where labels are produced for the adver-  
623 sarially chosen points  $D_1^b$ . By application of Lemma C.3,  $M_1$  is  $(1, \delta)$ -differentially private.  
624 (ii) The mechanism  $M_2$ , corresponds to the subsampling of  $\hat{S}_1^b$  from  $S_1^b$  and the applica-  
625 tion of procedure `LabelBoost` on the subsample in Step 3f of `GenericBBL` resulting in  
626  $S_2^b$ . By application of Claim 2.7 and Lemma C.1,  $M_2$  is  $(\epsilon, 0)$ -differentially private. Thus  
627  $(M_1, M_2)$  is  $(\epsilon + 1, \delta)$ -differentially private. (iii) The mechanism  $M_3$  with input of  $S^b$  and  
628 output  $(D_1^{b,L}, S_2^b) = (\text{View}_{\mathcal{B},R'_1}^b, S_2^b)$  applies  $(M_1, M_2)$  on the sub-sample  $S_1^b$  obtained from  
629  $S^b$  in Step 2 of `GenericBBL`. By application of Claim 2.7  $M_3$  is  $(\epsilon, \frac{4\epsilon\delta}{3+\exp(\epsilon+1)})$ -differentially  
630 private. Since  $\frac{4\epsilon\delta}{3+\exp(\epsilon+1)} \leq \delta$  for any  $\epsilon$ , hence  $(\text{View}_{\mathcal{B},R'_1}^0, S_2^0)$  and  $(\text{View}_{\mathcal{B},R'_1}^1, S_2^1)$  are  $(\epsilon, \delta)$ -  
631 indistinguishable  $\square$

632 **Privacy of the unlabeled points  $D$ .** Let  $D^0, D^1 \in X^t$  be neighboring datasets of unla-  
633 beled examples and let  $\text{View}_{\mathcal{B},t}^0$  and  $\text{View}_{\mathcal{B},t}^1$  be as in Figure 1 where  $(x_1^0, \dots, x_t^0) = D^0$  and  
634  $(x_1^1, \dots, x_t^1) = D^1$ .

635 **Claim E.6.** For all adversaries  $\mathcal{B}$ , for all  $t > 0$ , and for any two neighbouring databases  $D^0$  and  
636  $D^1$  selected by  $\mathcal{B}$ ,  $\text{View}_{\mathcal{B},t}^0$  and  $\text{View}_{\mathcal{B},t}^1$  are  $(\epsilon, \delta)$ -indistinguishable.

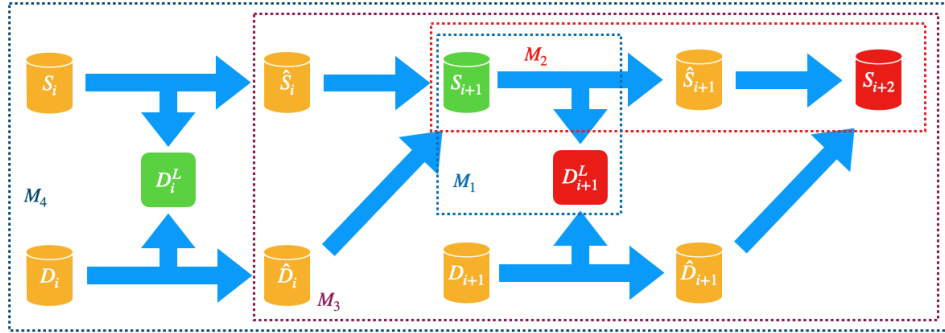

Figure 6: Privacy leakage of  $D_i$

637 *Proof.* Let  $D_1^0, D_2^0, \dots, D_k^0$  and  $D_1^1, D_2^1, \dots, D_k^1$  be the set of unlabeled databases in step 3e of  
638 `GenericBBL`. Without loss of generality, we assume  $D_i^0$  and  $D_i^1$  differ on one entry. When  
639  $i = k$ ,  $\text{View}_{\mathcal{B},t}^0 = \text{View}_{\mathcal{B},t}^1$  because all selected hypothesis are the same. When  $i < k$ , let  
640  $R' = \min(\sum_{j=1}^{i+1} R_j, t)$ .

641 Similar to the analysis if Claim E.5,  $\text{View}_{\mathcal{B},t}^b$  results from a post-processing of the ran-  
642 dom variable  $(\text{View}_{\mathcal{B},R'}^b, S_{i+2}^b)$  (if  $t < \sum_{j=1}^{i+1} R_j$  we set  $S_{i+2}^b$  as  $\perp$ ). Note that  $\text{View}_{\mathcal{B},R'_1}^b =$   
643  $(D_1^{b,L}, \dots, D_i^{b,L^*}, D_{i+1}^{b,L})$ , and  $(D_1^{b,L}, \dots, D_{i-1}^{b,L}, D_i^{b,L^*})$  follow the same distribution for  $b \in \{0, 1\}$ ,  
644 where  $D_i^{b,L^*}$  is the labels of points in  $D_i^b$  expect the different point. So that it suffices to show  
645 that  $(D_{i+1}^{0,L}, S_2^0)$  and  $(D_{i+1}^{1,L}, S_2^1)$  are  $(\epsilon, \delta)$ -indistinguishable.

646 We follow the processes creating  $D_{i+1}^{b,L}$  and  $S_{i+2}^b$  in Figure 6: (i) The mechanism  $M_1$  corre-  
 647 sponds to the loop in Step 3d of `GenericBBL` where labels are produced for the adversarially  
 648 chosen points  $D_{i+1}^b$ . By application of Lemma C.3,  $M_1$  is  $(1, \delta)$ -differentially private. (ii)  
 649 The mechanism  $M_2$ , corresponds to the subsampling of  $\hat{S}_{i+1}^b$  from  $S_{i+1}^b$  and the applica-  
 650 tion of procedure `LabelBoost` on the subsample in Step 3f of `GenericBBL` resulting in  
 651  $S_{i+2}^b$ . By application of Claim 2.7 and Lemma C.1,  $M_2$  is  $(\varepsilon, 0)$ -differentially private. Thus  
 652  $(M_1, M_2)$  is  $(\varepsilon + 1, \delta)$ -differentially private. (iii) The mechanism  $M_3$  with input of  $\hat{D}_i^b$  and  
 653 output  $(D_{i+1}^{b,L}, S_{i+2}^b)$  applies  $(M_2, M_3)$  on  $S_{i+1}$ , which is generated from  $\hat{D}_i^b$  and in Step 3f  
 654 of `GenericBBL`. By application of Claim C.1,  $M_3$  is  $(\varepsilon + 4, 4\varepsilon\delta)$ -differentially private. (iv)  
 655 The mechanism  $M_4$ , corresponds to the subsampling  $\hat{D}_i^b$  from  $D_i^b$  and the application of  
 656  $M_4$  on  $\hat{D}_i^b$ . By application of Claim 2.7,  $M_4$  is  $(\varepsilon, \frac{16\varepsilon\delta}{3+\exp(\varepsilon+4)})$ -differentially private. Since  
 657  $\frac{16\varepsilon\varepsilon}{3+\exp(\varepsilon+4)} \leq 1$  for any  $\varepsilon$ ,  $(D_{i+1}^{0,L}, S_2^0)$  and  $(D_{i+1}^{1,L}, S_2^1)$  are  $(\varepsilon, \delta)$ -indistinguishable.  $\square$

658 **Remark E.7.** *The above proofs work on the adversarially selected  $D$  because: (i) Lemma C.3*  
 659 *works on the adaptively selected queries. (We treat the hypothesis class  $F_i$  as the database, the*  
 660 *unlabelled points  $x_{i,\ell}$  as the query parameters.) (ii) `LabelBoost` generates labels by applying one*  
 661 *private hypothesis on points. The labels are differentially private by post-processing.*
